# Supplementary material for: APC is required for muscle stem cell proliferation and skeletal muscle tissue repair
Source: PubMed Central journal article supplement — J Cell Biol. 2015 Aug 31;210(5):717–26. doi: 10.1083/jcb.201501053 (PMC4555822; doi:10.1083/jcb.201501053), 2015-08-31
Supplement: supp_jcb.201501053_JCB_201501053_sm.pdf [file supp_jcb.201501053_JCB_201501053_sm.pdf]

Parisi et al., <http://www.jcb.org/cgi/content/full/jcb.201501053/DC1>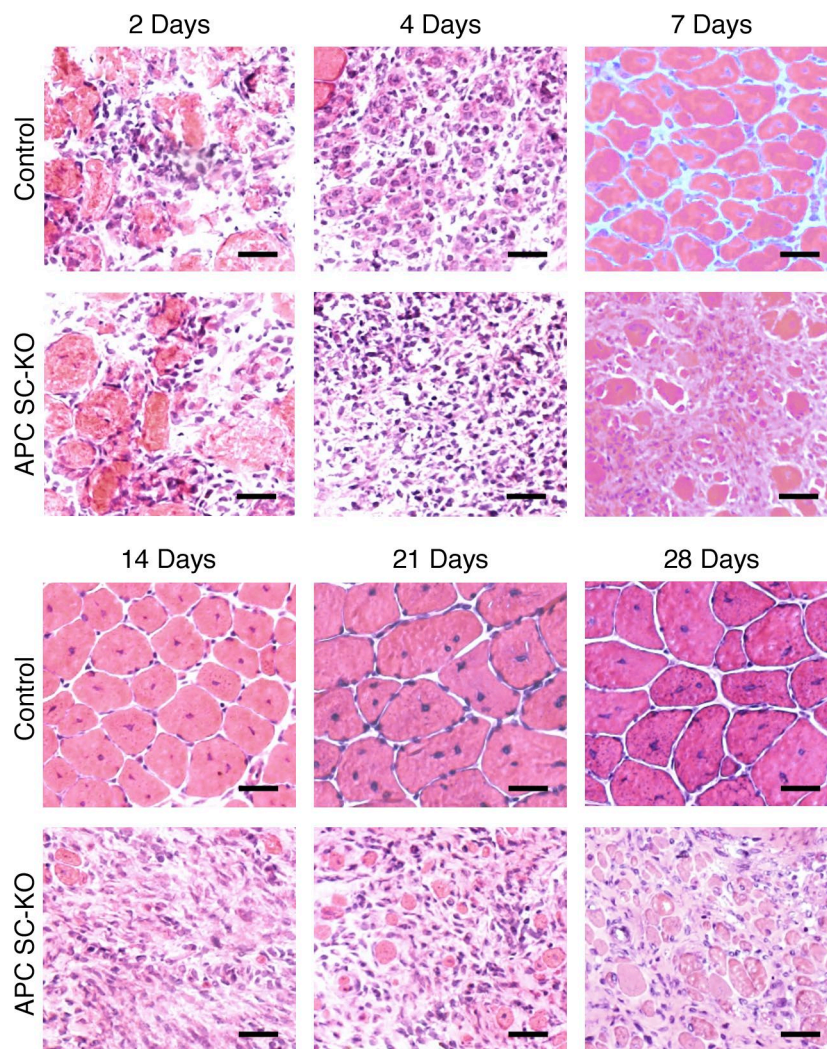

Figure S1. **APC expression by muscle stem cell is required for muscle regeneration, related to Fig. 2.** Hematoxylin and eosin staining of cryosections from control and APC SC-KO muscles sampled at different time point after CTX injection. Control muscles can efficiently regenerate, as shown by the presence of centrally nucleated myofibers, whereas APC SC-KO muscles present complete regeneration failure. Bars, 50  $\mu$ m.

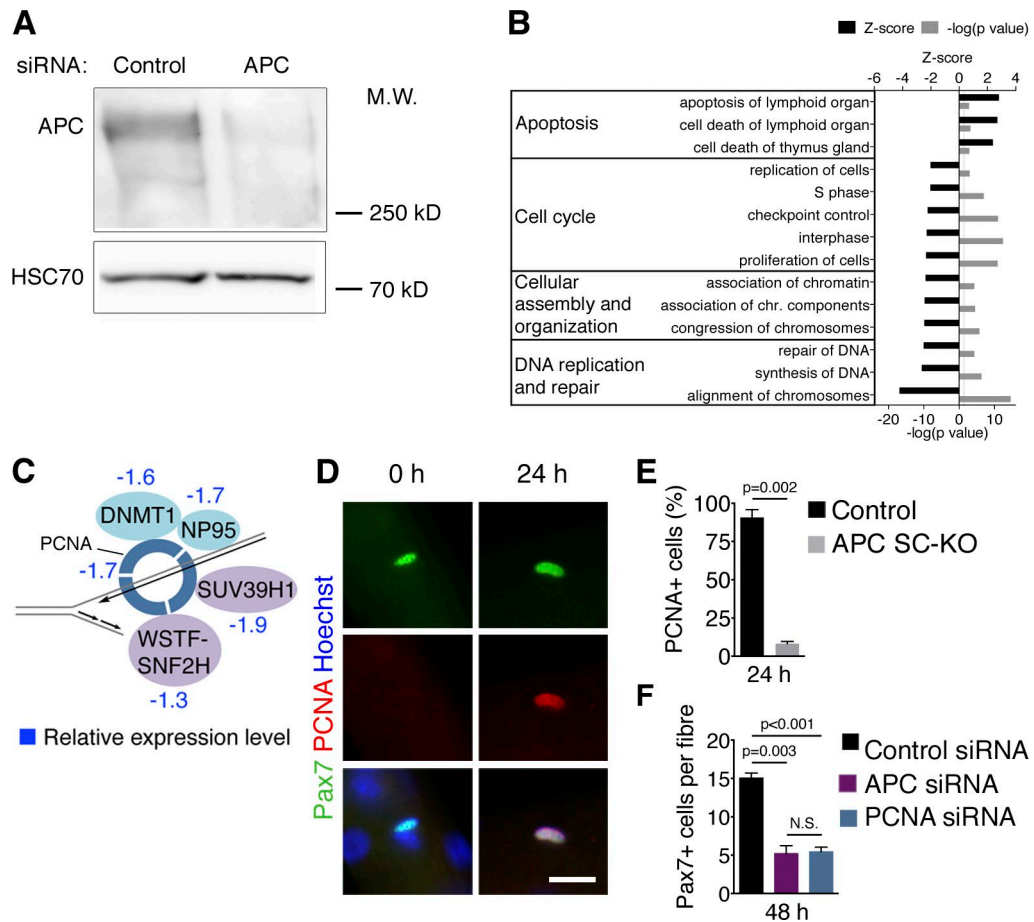

Figure S2. **APC loss affects DNA replication and cell cycle progression, related to Fig. 3.** (A) APC Western blotting shows a decrease in APC protein level on proliferating primary myoblasts transfected with an siRNA targeting APC. (B) Representation of the 14 most relevant biological functions and their categories predicted by microarray analysis to be activated (z-score > 2) or inhibited (z-score < -2) after APC silencing as compared with control proliferating myoblasts. (C) Schematic representation of DNA replication fork and the associated factors. Numbers indicate the fold changes of the expression levels obtained by microarray between APC-silenced and control primary myoblasts. (D) Pax7 and PCNA immunostaining on EDL single myofibers isolated from wild-type animals and directly fixed (0 h) or cultured for 24 h. Nuclei were stained with Hoechst. Bar, 10  $\mu$ m. (E) Quantification of the percentage of satellite cells expressing PCNA on single fibers isolated from control and APC SC-KO EDL and cultured for 24 h. (F) Quantification of the number of satellite cells per fiber on EDL single fibers transfected with control, APC, or PCNA siRNA and cultured for 48 h. Bars, 50  $\mu$ m.

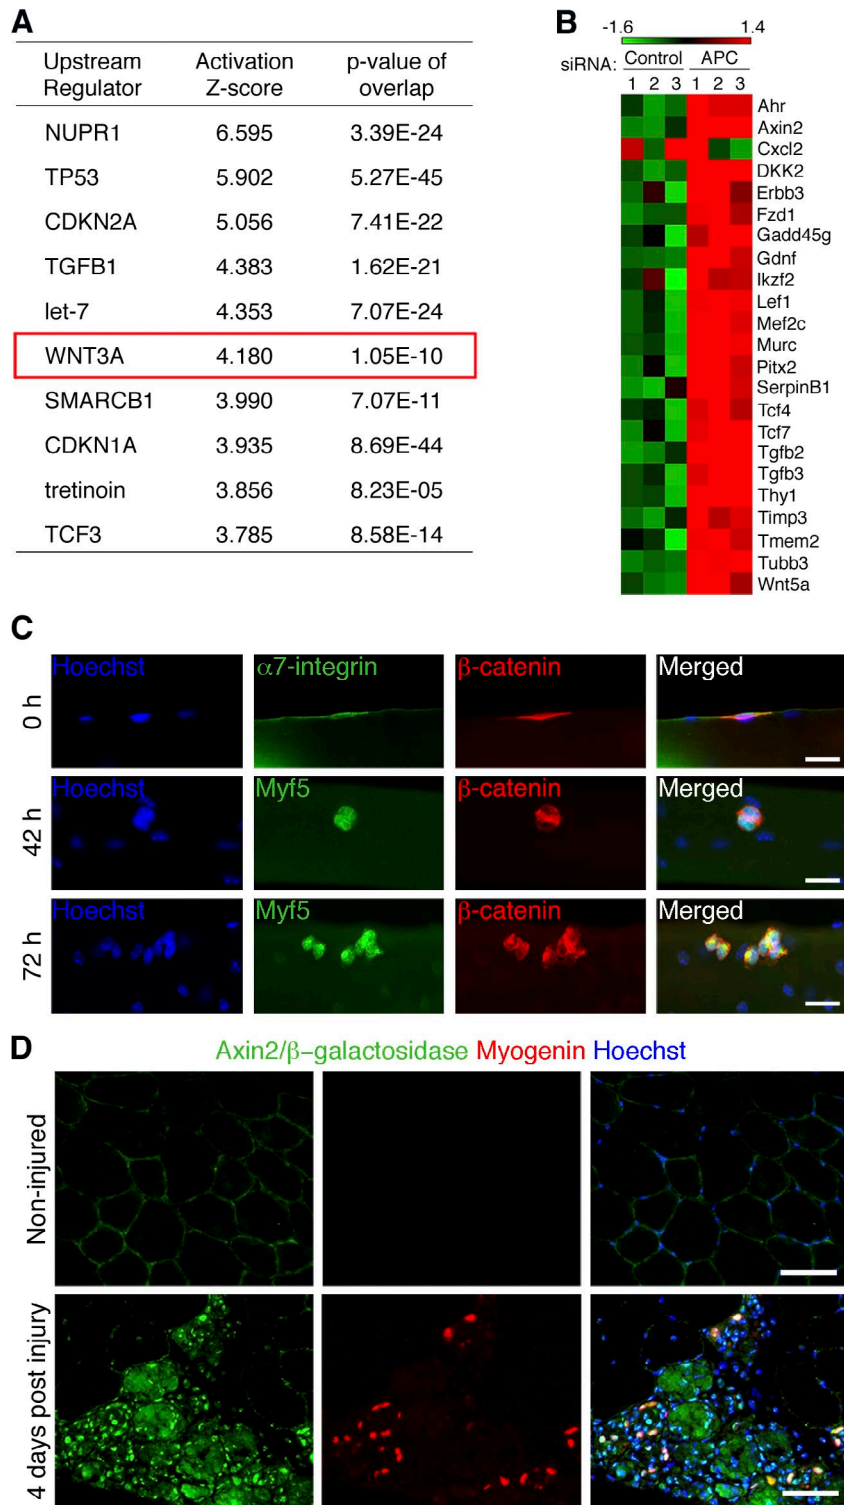

Figure S3. **APC loss activates canonical Wnt signaling, related to Fig. 4.** (A) Table depicting the 10 upstream regulators with highest activation z-score identified by pathway analysis of microarray comparing control and APC-silenced primary myoblasts. (B) Heat map representing the expression level of genes belonging to canonical Wnt pathway (Wnt3a) identified by pathway analysis of microarrays comparing control and APC-silenced primary myoblasts. 1, 2, and 3 indicate three independent experiments. Each row is normalized to have mean zero, variance one. (C) Immunofluorescent staining for  $\alpha$ 7-integrin, Myf5, and  $\beta$ -catenin on single EDL fibers isolated and fixed (0 h) or cultured for 42 and 72 h.  $\beta$ -Catenin is detected only in the cytoplasm of quiescent satellite cells and accumulates in the nucleus only after 72 h of culture. This indicates that  $\beta$ -catenin subcellular localization is modulated during myogenic lineage progression. Bars, 10  $\mu$ m. (D)  $\beta$ -galactosidase and Myogenin immunostaining on sections of noninjured TA muscles and injured TA muscles sampled 4 d after CTX injection from Axin2<sup>lacZ/+</sup> mice, in which the lacZ gene coding for the  $\beta$ -galactosidase protein has been inserted within the Axin2 locus. This enables us to monitor canonical Wnt signaling activity. In noninjured muscles,  $\beta$ -galactosidase is not expressed. Conversely, 4 d after injury, differentiating myocytes that express Myogenin are also positive for  $\beta$ -galactosidase, suggesting that canonical Wnt signaling is only active in differentiating cells and not in quiescent satellite cells. Bars, 50  $\mu$ m.

Table S1. Gene ontology (GO) analysis of APC-silenced primary myoblasts

| Category           | Term                                                    | Count | P-value                | Fold enrichment | Bonferroni             | Benjamini              | FDR                    |
|--------------------|---------------------------------------------------------|-------|------------------------|-----------------|------------------------|------------------------|------------------------|
| Molecular function | GO:0000166 nucleotide binding                           | 109   | $2.30 \times 10^{-7}$  | 1.60            | $1.26 \times 10^{-4}$  | $1.26 \times 10^{-5}$  | $3.36 \times 10^{-4}$  |
|                    | GO:0017076 purine nucleotide binding                    | 101   | $1.69 \times 10^{-8}$  | 1.73            | $9.22 \times 10^{-6}$  | $1.02 \times 10^{-6}$  | $2.46 \times 10^{-5}$  |
|                    | GO:0032553 ribonucleotide binding                       | 99    | $8.73 \times 10^{-9}$  | 1.77            | $4.77 \times 10^{-6}$  | $6.82 \times 10^{-7}$  | $1.27 \times 10^{-5}$  |
|                    | GO:0032555 purine ribonucleotide binding                | 99    | $8.73 \times 10^{-9}$  | 1.77            | $4.77 \times 10^{-6}$  | $6.82 \times 10^{-7}$  | $1.27 \times 10^{-5}$  |
|                    | GO:0001882 nucleoside binding                           | 91    | $2.63 \times 10^{-9}$  | 1.87            | $1.44 \times 10^{-6}$  | $7.20 \times 10^{-7}$  | $3.84 \times 10^{-6}$  |
|                    | GO:0001883 purine nucleoside binding                    | 90    | $4.25 \times 10^{-9}$  | 1.87            | $2.33 \times 10^{-6}$  | $7.75 \times 10^{-7}$  | $6.20 \times 10^{-6}$  |
|                    | GO:0030554 adenylyl nucleotide binding                  | 88    | $1.30 \times 10^{-8}$  | 1.84            | $7.13 \times 10^{-6}$  | $8.92 \times 10^{-7}$  | $1.90 \times 10^{-5}$  |
|                    | GO:0003677 DNA binding                                  | 87    | $1.51 \times 10^{-5}$  | 1.57            | $8.25 \times 10^{-3}$  | $6.37 \times 10^{-4}$  | $2.21 \times 10^{-2}$  |
|                    | GO:0032559 adenylyl ribonucleotide binding              | 86    | $5.76 \times 10^{-9}$  | 1.89            | $3.15 \times 10^{-6}$  | $7.88 \times 10^{-7}$  | $8.40 \times 10^{-6}$  |
|                    | GO:0005524 ATP binding                                  | 85    | $7.31 \times 10^{-9}$  | 1.89            | $4.00 \times 10^{-6}$  | $6.66 \times 10^{-7}$  | $1.07 \times 10^{-5}$  |
| Cellular component | GO:0043228 non-membrane-bounded organelle               | 160   | $2.94 \times 10^{-33}$ | 2.59            | $1.03 \times 10^{-30}$ | $3.44 \times 10^{-31}$ | $4.02 \times 10^{-30}$ |
|                    | GO:0043232 intracellular non-membrane-bounded organelle | 160   | $2.94 \times 10^{-33}$ | 2.59            | $1.03 \times 10^{-30}$ | $3.44 \times 10^{-31}$ | $4.02 \times 10^{-30}$ |
|                    | GO:0005856 cytoskeleton                                 | 95    | $7.81 \times 10^{-19}$ | 2.63            | $2.74 \times 10^{-16}$ | $3.05 \times 10^{-17}$ | $1.07 \times 10^{-15}$ |
|                    | GO:0005694 chromosome                                   | 78    | $9.00 \times 10^{-41}$ | 6.40            | $3.16 \times 10^{-38}$ | $3.16 \times 10^{-38}$ | $1.23 \times 10^{-37}$ |
|                    | GO:0044430 cytoskeletal part                            | 70    | $5.06 \times 10^{-15}$ | 2.81            | $1.79 \times 10^{-12}$ | $1.28 \times 10^{-13}$ | $6.98 \times 10^{-12}$ |
|                    | GO:0044427 chromosomal part                             | 69    | $2.41 \times 10^{-37}$ | 6.73            | $8.46 \times 10^{-35}$ | $4.23 \times 10^{-35}$ | $3.30 \times 10^{-34}$ |
|                    | GO:0015630 microtubule cytoskeleton                     | 48    | $7.06 \times 10^{-13}$ | 3.31            | $2.48 \times 10^{-10}$ | $1.55 \times 10^{-11}$ | $9.66 \times 10^{-10}$ |
|                    | GO:0000775 chromosome, centromeric region               | 42    | $4.50 \times 10^{-33}$ | 11.74           | $1.58 \times 10^{-30}$ | $3.95 \times 10^{-31}$ | $6.15 \times 10^{-30}$ |
|                    | GO:0000793 condensed chromosome                         | 33    | $9.69 \times 10^{-23}$ | 9.57            | $3.40 \times 10^{-20}$ | $6.81 \times 10^{-21}$ | $1.33 \times 10^{-19}$ |
|                    | GO:0043292 contractile fiber                            | 28    | $9.93 \times 10^{-19}$ | 9.14            | $3.49 \times 10^{-16}$ | $3.49 \times 10^{-17}$ | $1.36 \times 10^{-15}$ |
| Biological process | GO:0007049 cell cycle                                   | 111   | $1.46 \times 10^{-50}$ | 5.35            | $3.20 \times 10^{-47}$ | $3.20 \times 10^{-47}$ | $2.53 \times 10^{-47}$ |
|                    | GO:0022402 cell cycle process                           | 85    | $3.19 \times 10^{-44}$ | 6.38            | $6.99 \times 10^{-41}$ | $1.75 \times 10^{-41}$ | $5.54 \times 10^{-41}$ |
|                    | GO:0022403 cell cycle phase                             | 81    | $1.10 \times 10^{-46}$ | 7.28            | $2.41 \times 10^{-43}$ | $8.02 \times 10^{-44}$ | $1.91 \times 10^{-43}$ |
|                    | GO:0000279 M phase                                      | 77    | $1.30 \times 10^{-47}$ | 8.02            | $2.85 \times 10^{-44}$ | $1.42 \times 10^{-44}$ | $2.26 \times 10^{-44}$ |
|                    | GO:0051301 cell division                                | 73    | $1.53 \times 10^{-43}$ | 7.66            | $3.35 \times 10^{-40}$ | $5.58 \times 10^{-41}$ | $2.65 \times 10^{-40}$ |
|                    | GO:0000278 mitotic cell cycle                           | 68    | $1.31 \times 10^{-42}$ | 8.21            | $2.87 \times 10^{-39}$ | $4.11 \times 10^{-40}$ | $2.28 \times 10^{-39}$ |
|                    | GO:0000087 M phase of mitotic cell cycle                | 63    | $7.62 \times 10^{-44}$ | 9.57            | $1.67 \times 10^{-40}$ | $3.34 \times 10^{-41}$ | $1.32 \times 10^{-40}$ |
|                    | GO:0007067 mitosis                                      | 61    | $4.33 \times 10^{-42}$ | 9.46            | $9.50 \times 10^{-39}$ | $1.19 \times 10^{-39}$ | $7.53 \times 10^{-39}$ |
|                    | GO:0000280 nuclear division                             | 61    | $4.33 \times 10^{-42}$ | 9.46            | $9.50 \times 10^{-39}$ | $1.19 \times 10^{-39}$ | $7.53 \times 10^{-39}$ |
|                    | GO:0048285 organelle fission                            | 61    | $4.67 \times 10^{-41}$ | 9.13            | $1.03 \times 10^{-37}$ | $1.14 \times 10^{-38}$ | $8.12 \times 10^{-38}$ |

FDR, false discovery rate.

**Table S2 lists the genes that exhibit changes in expression after APC silencing, and is available as a PDF.**
