# Supplementary material for: APC is required for muscle stem cell proliferation and skeletal muscle tissue repair
Source: PubMed Central journal article supplement — J Cell Biol. 2015 Aug 31;210(5):717–26. doi: 10.1083/jcb.201501053 (PMC4555822; doi:10.1083/jcb.201501053), 2015-08-31
Supplement: supp_jcb.201501053_JCB_201501053_TableS2.pdf [file supp_jcb.201501053_JCB_201501053_TableS2.pdf]

Table S2. **Changes in gene expression following APC silencing**

| <b>GeneID</b> | <b>Symbol</b>                   | <b>Entrez gene name</b>                                      | <b>P-value</b> | <b>Fold change</b> |
|---------------|---------------------------------|--------------------------------------------------------------|----------------|--------------------|
| 14613         | GJA5                            | gap junction protein, alpha 5, 40kDa                         | 0.000139162    | 10.0104            |
| 12310         | CALCA                           | calcitonin-related polypeptide alpha                         | 0.0000114      | 9.7344             |
| 381489        | RXFP1                           | relaxin/insulin-like family peptide receptor 1               | 0.0000955      | 5.93781            |
| 27062         | CADPS                           | Ca <sup>++</sup> -dependent secretion activator              | 0.000127279    | 5.73384            |
| 14313         | FST                             | follistatin                                                  | 0.0000202      | 5.50779            |
| 102371        | GCOM1                           | GRINL1A complex locus 1                                      | 0.00144887     | 4.84546            |
| 242316        | GDF6                            | growth differentiation factor 6                              | 0.0000794      | 4.56858            |
| 319504        | NRCAM                           | neuronal cell adhesion molecule                              | 0.000429008    | 4.05073            |
| 12156         | BMP2                            | bone morphogenetic protein 2                                 | 0.000127483    | 3.62437            |
| 379043        | Raet1d/Raet1e                   | retinoic acid early transcript 1E                            | 0.000285962    | 3.48093            |
| 13078         | CYP1B1                          | cytochrome P450, family 1, subfamily B, polypeptide 1        | 0.0000856      | 3.39197            |
| 70536         | QPCT                            | glutaminy-peptide cyclotransferase                           | 0.000446354    | 3.3819             |
| 73998         | HERC3                           | HECT and RLD domain containing E3 ubiquitin protein ligase 3 | 0.000236794    | 3.33285            |
| 319476        | LRTM1                           | leucine-rich repeats and transmembrane domains 1             | 0.000183572    | 3.28902            |
| 18600         | PADI2                           | peptidyl arginine deiminase, type II                         | 0.000317631    | 2.94752            |
| 56811         | DKK2                            | dickkopf 2 homolog ( <i>Xenopus laevis</i> )                 | 0.000124152    | 2.93151            |
| 20893         | BHLHE40                         | basic helix-loop-helix family, member e40                    | 0.000348065    | 2.86923            |
| 74205         | ACSL3                           | acyl-CoA synthetase long-chain family member 3               | 0.0000687      | 2.84805            |
| 80976         | SYT13                           | synaptotagmin XIII                                           | 0.000272994    | 2.83652            |
| 71929         | TMEM123<br>(includes EG:114908) | transmembrane protein 123                                    | 0.000155402    | 2.82831            |
| 16008         | IGFBP2                          | insulin-like growth factor binding protein 2, 36kDa          | 0.0000159      | 2.75451            |
| 16878         | LIF                             | leukemia inhibitory factor                                   | 0.000745022    | 2.72545            |
| 11861         | ARL4A                           | ADP-ribosylation factor-like 4A                              | 0.00000855     | 2.71888            |
| 18645         | Pfn2                            | profilin 2                                                   | 0.00151086     | 2.68286            |
| 12006         | AXIN2                           | axin 2                                                       | 0.000229797    | 2.67583            |
| 12350         | CA3                             | carbonic anhydrase III, muscle specific                      | 0.00000294     | 2.59775            |
| 66104         | TCEAL3                          | transcription elongation factor A (SII)-like 3               | 0.00759864     | 2.56238            |
| 320078        | OLFML2B                         | olfactomedin-like 2B                                         | 0.0111915      | 2.527              |
| 21808         | TGFB2                           | transforming growth factor, beta 2                           | 0.000325279    | 2.51958            |
| 116903        | Calcb                           | calcitonin-related polypeptide, beta                         | 0.00216645     | 2.51957            |
| 260315        | NAV3                            | neuron navigator 3                                           | 0.0000338      | 2.48417            |
| 74136         | SEC14L1                         | SEC14-like 1 ( <i>S. cerevisiae</i> )                        | 0.0000202      | 2.46523            |
| 22152         | TUBB3                           | tubulin, beta 3 class III                                    | 0.0000345      | 2.46354            |
| 21838         | THY1                            | Thy-1 cell surface antigen                                   | 0.000590575    | 2.44014            |
| 20502         | SLC16A2                         | solute carrier family 16, member 2                           | 0.00603943     | 2.43642            |

|        |           | (thyroid hormone transporter)                                                               |             |         |
|--------|-----------|---------------------------------------------------------------------------------------------|-------------|---------|
| 238564 | MYLK4     | myosin light chain kinase family, member 4                                                  | 0.00292528  | 2.41081 |
| 667281 | H60b/H60c | histocompatibility 60c                                                                      | 0.0017185   | 2.39018 |
| 14573  | GDNF      | glial cell derived neurotrophic factor                                                      | 0.000511688 | 2.38779 |
| 116904 | ALPK3     | alpha-kinase 3                                                                              | 0.00341546  | 2.38626 |
| 69564  | NMRK2     | nicotinamide riboside kinase 2                                                              | 0.0015516   | 2.38296 |
| 233246 | ANO5      | anoctamin 5                                                                                 | 0.000151587 | 2.34948 |
| 242022 | FREM2     | FRAS1 related extracellular matrix protein 2                                                | 0.000128029 | 2.34503 |
| 77018  | COL25A1   | collagen, type XXV, alpha 1                                                                 | 0.00055496  | 2.29612 |
| 195434 | Utp14b    | UTP14, U3 small nucleolar ribonucleoprotein, homolog B (yeast)                              | 0.000489002 | 2.25091 |
| 26570  | SLC7A11   | solute carrier family 7 (anionic amino acid transporter light chain, xc- system), member 11 | 0.011821    | 2.24318 |
| 22418  | WNT5A     | wingless-type MMTV integration site family, member 5A                                       | 0.00252031  | 2.23211 |
| 545428 | CCDC141   | coiled-coil domain containing 141                                                           | 0.00189245  | 2.21413 |
| 116701 | FGFRL1    | fibroblast growth factor receptor-like 1                                                    | 0.00309149  | 2.21018 |
| 21417  | ZEB1      | zinc finger E-box binding homeobox 1                                                        | 0.000193565 | 2.17643 |
| 14284  | FOSL2     | FOS-like antigen 2                                                                          | 0.00734607  | 2.1761  |
| 117600 | SRGAP1    | SLIT-ROBO Rho GTPase activating protein 1                                                   | 0.000141465 | 2.16296 |
| 16909  | LMO2      | LIM domain only 2 (rhombotin-like 1)                                                        | 0.014621    | 2.16197 |
| 319713 | ABLIM3    | actin binding LIM protein family, member 3                                                  | 0.00169432  | 2.15517 |
| 331532 | TCEAL5    | transcription elongation factor A (SII)-like 5                                              | 0.00246232  | 2.12167 |
| 20347  | SEMA3B    | sema domain, immunoglobulin domain (Ig), short basic domain, secreted, (semaphorin) 3B      | 0.000426333 | 2.11929 |
| 53627  | PORCN     | porcupine homolog (Drosophila)                                                              | 0.00147374  | 2.0649  |
| 17879  | MYH1      | myosin, heavy chain 1, skeletal muscle, adult                                               | 0.00192746  | 2.05954 |
| 20348  | SEMA3C    | sema domain, immunoglobulin domain (Ig), short basic domain, secreted, (semaphorin) 3C      | 0.0118369   | 2.05334 |
| 20271  | SCN5A     | sodium channel, voltage-gated, type V, alpha subunit                                        | 0.000207574 | 2.04768 |
| 104252 | CDC42EP2  | CDC42 effector protein (Rho GTPase binding) 2                                               | 0.00622925  | 2.02107 |
| 66898  | BAIAP2L1  | BAI1-associated protein 2-like 1                                                            | 0.000293426 | 2.02071 |
| 243362 | STARD13   | StAR-related lipid transfer (START) domain containing 13                                    | 0.00231879  | 2.01646 |
| 58916  | MYOT      | myotilin                                                                                    | 0.00612892  | 1.99201 |
| 15476  | HS3ST1    | heparan sulfate (glucosamine) 3-O-sulfotransferase 1                                        | 0.00226536  | 1.9694  |
| 20964  | SYN1      | synapsin I                                                                                  | 0.000943027 | 1.96818 |
| 106393 | SRL       | sarcalumenin                                                                                | 0.0000677   | 1.96687 |
| 20897  | STRA6     | stimulated by retinoic acid gene 6                                                          | 0.00201254  | 1.9652  |

|        |                          | homolog (mouse)                                                                                                                             |             |         |
|--------|--------------------------|---------------------------------------------------------------------------------------------------------------------------------------------|-------------|---------|
| 66175  | MUSTN1                   | musculoskeletal, embryonic nuclear protein 1                                                                                                | 0.00175942  | 1.96167 |
| 22437  | XIRP1                    | xin actin-binding repeat containing 1                                                                                                       | 0.000300989 | 1.96164 |
| 68312  | GSTM2                    | glutathione S-transferase mu 2 (muscle)                                                                                                     | 0.00203272  | 1.94437 |
| 20515  | SLC20A1                  | solute carrier family 20 (phosphate transporter), member 1                                                                                  | 0.0000497   | 1.94147 |
| 666060 | FRMPD1                   | FERM and PDZ domain containing 1                                                                                                            | 0.000235845 | 1.93372 |
| 79201  | Tnfrsf22/Tnfrsf23        | tumor necrosis factor receptor superfamily, member 22                                                                                       | 0.000449351 | 1.92875 |
| 21916  | TMOD1                    | tropomodulin 1                                                                                                                              | 0.0348894   | 1.92711 |
| 20411  | SORBS1                   | sorbin and SH3 domain containing 1                                                                                                          | 0.000403342 | 1.92455 |
| 19716  | Bex1                     | brain expressed gene 1                                                                                                                      | 0.00113367  | 1.92405 |
| 20356  | SEMA5A                   | sema domain, seven thrombospondin repeats (type 1 and type 1-like), transmembrane domain (TM) and short cytoplasmic domain, (semaphorin) 5A | 0.000346576 | 1.92389 |
| 53311  | MYBPH                    | myosin binding protein H                                                                                                                    | 0.0042596   | 1.92183 |
| 13175  | DCLK1                    | doublecortin-like kinase 1                                                                                                                  | 0.00278589  | 1.91873 |
| 208618 | KIAA1217                 | KIAA1217                                                                                                                                    | 0.000431922 | 1.91549 |
| 12053  | BCL6                     | B-cell CLL/lymphoma 6                                                                                                                       | 0.00467532  | 1.91125 |
| 11622  | AHR                      | aryl hydrocarbon receptor                                                                                                                   | 0.00131742  | 1.90913 |
| 66109  | TSPAN13                  | tetraspanin 13                                                                                                                              | 0.000303531 | 1.90659 |
| 238161 | AKAP6                    | A kinase (PRKA) anchor protein 6                                                                                                            | 0.00292545  | 1.9037  |
| 20364  | SEPW1                    | selenoprotein W, 1                                                                                                                          | 0.0123262   | 1.89867 |
| 211389 | SUOX                     | sulfite oxidase                                                                                                                             | 0.0333012   | 1.88136 |
| 66222  | SERPINB1                 | serpin peptidase inhibitor, clade B (ovalbumin), member 1                                                                                   | 0.00662288  | 1.87678 |
| 14199  | FHL1 (includes EG:14199) | four and a half LIM domains 1                                                                                                               | 0.0000592   | 1.87621 |
| 76895  | BICD2                    | bicaudal D homolog 2 (Drosophila)                                                                                                           | 0.00402865  | 1.86341 |
| 12224  | KLF5                     | Kruppel-like factor 5 (intestinal)                                                                                                          | 0.00335733  | 1.85312 |
| 21817  | TGM2 (includes EG:21817) | transglutaminase 2 (C polypeptide, protein-glutamine-gamma-glutamyltransferase)                                                             | 0.00414889  | 1.85008 |
| 68939  | RASL11B                  | RAS-like, family 11, member B                                                                                                               | 0.0163348   | 1.848   |
| 73884  | ZDBF2                    | zinc finger, DBF-type containing 2                                                                                                          | 0.00749392  | 1.83875 |
| 218793 | UBE2E2                   | ubiquitin-conjugating enzyme E2E 2                                                                                                          | 0.00284904  | 1.83734 |
| 19012  | PPAP2A                   | phosphatidic acid phosphatase type 2A                                                                                                       | 0.000295202 | 1.82814 |
| 17258  | MEF2A                    | myocyte enhancer factor 2A                                                                                                                  | 0.0130219   | 1.82695 |
| 72607  | USP13                    | ubiquitin specific peptidase 13 (isopeptidase T-3)                                                                                          | 0.0112072   | 1.82172 |
| 244654 | MTSS1L                   | metastasis suppressor 1-like                                                                                                                | 0.0115043   | 1.81857 |
| 723817 | mir-133                  | microRNA 133a-1                                                                                                                             | 0.0000538   | 1.81586 |
| 24053  | SGCG                     | sarcoglycan, gamma (35kDa dystrophin-associated glycoprotein)                                                                               | 0.00337368  | 1.81569 |
| 63828  | FN3K                     | fructosamine 3 kinase                                                                                                                       | 0.0152324   | 1.81135 |
| 68728  | TP53INP2                 | tumor protein p53 inducible nuclear protein 2                                                                                               | 0.00067951  | 1.81125 |

|        |                              |                                                                                 |             |         |
|--------|------------------------------|---------------------------------------------------------------------------------|-------------|---------|
| 20856  | STC2                         | stanniocalcin 2                                                                 | 0.0105618   | 1.80921 |
| 14360  | FYN                          | FYN oncogene related to SRC, FGR, YES                                           | 0.0012721   | 1.80757 |
| 67092  | GATM                         | glycine amidinotransferase (L-arginine:glycine amidinotransferase)              | 0.000161587 | 1.79093 |
| 30937  | LMCD1                        | LIM and cysteine-rich domains 1                                                 | 0.00132416  | 1.7858  |
| 53625  | B3GNT2                       | UDP-GlcNAc:betaGal beta-1,3-N-acetylglucosaminyltransferase 2                   | 0.0102956   | 1.78495 |
| 234214 | SORBS2                       | sorbin and SH3 domain containing 2                                              | 0.00542194  | 1.78481 |
| 17260  | MEF2C                        | myocyte enhancer factor 2C                                                      | 0.0014967   | 1.78413 |
| 68802  | MYPN                         | myopalladin                                                                     | 0.009179    | 1.78006 |
| 13371  | DIO2                         | deiodinase, iodothyronine, type II                                              | 0.0000404   | 1.77988 |
| 77976  | NUAK1                        | NUAK family, SNF1-like kinase, 1                                                | 0.00644414  | 1.77987 |
| 14362  | FZD1                         | frizzled family receptor 1                                                      | 0.00369572  | 1.77943 |
| 228357 | LRP4                         | low density lipoprotein receptor-related protein 4                              | 0.00833973  | 1.77521 |
| 21857  | TIMP1                        | TIMP metalloproteinase inhibitor 1                                              | 0.0104079   | 1.7698  |
| 381339 | TMEM182                      | transmembrane protein 182                                                       | 0.00593429  | 1.76947 |
| 19091  | PRKG1                        | protein kinase, cGMP-dependent, type I                                          | 0.000966223 | 1.76819 |
| 74013  | RFTN2                        | raftlin family member 2                                                         | 0.0147611   | 1.76806 |
| 18383  | TNFRSF11B                    | tumor necrosis factor receptor superfamily, member 11b                          | 0.00536318  | 1.76716 |
| 19087  | PRKAR2A                      | protein kinase, cAMP-dependent, regulatory, type II, alpha                      | 0.00575721  | 1.7665  |
| 21809  | TGFB3                        | transforming growth factor, beta 3                                              | 0.00231163  | 1.76555 |
| 17906  | MYL2                         | myosin, light chain 2, regulatory, cardiac, slow                                | 0.00831603  | 1.75086 |
| 71310  | TBC1D9                       | TBC1 domain family, member 9 (with GRAM domain)                                 | 0.00553172  | 1.74807 |
| 80796  | CALML5                       | calmodulin-like 5                                                               | 0.0000724   | 1.74794 |
| 69253  | HSPB2                        | heat shock 27kDa protein 2                                                      | 0.00124635  | 1.74484 |
| 19339  | RAB3A                        | RAB3A, member RAS oncogene family                                               | 0.0172059   | 1.7444  |
| 382427 | BEST3                        | bestrophin 3                                                                    | 0.00589558  | 1.74346 |
| 234593 | NDRG4                        | NDRG family member 4                                                            | 0.00144515  | 1.74313 |
| 78286  | NAV2                         | neuron navigator 2                                                              | 0.00502704  | 1.74139 |
| 20649  | SNTB1                        | syntrophin, beta 1 (dystrophin-associated protein A1, 59kDa, basic component 1) | 0.0103223   | 1.74025 |
| 11474  | ACTN3                        | actinin, alpha 3                                                                | 0.011472    | 1.73957 |
| 78248  | ARMCX1                       | armadillo repeat containing, X-linked 1                                         | 0.00648038  | 1.73924 |
| 27404  | ABCA8                        | ATP-binding cassette, sub-family A (ABC1), member 8                             | 0.00091179  | 1.73011 |
| 68016  | MURC                         | muscle-related coiled-coil protein                                              | 0.000599963 | 1.72391 |
| 17930  | MYOM2<br>(includes EG:17930) | myomesin (M-protein) 2, 165kDa                                                  | 0.0125097   | 1.72311 |
| 378431 | TXLNB                        | taxilin beta                                                                    | 0.00227726  | 1.72227 |
| 13867  | ERBB3                        | v-erb-b2 erythroblastic leukemia viral oncogene homolog 3 (avian)               | 0.0233151   | 1.71944 |
| 108735 | SFT2D2                       | SFT2 domain containing 2                                                        | 0.0357621   | 1.71931 |

|        |                   |                                                          |             |         |
|--------|-------------------|----------------------------------------------------------|-------------|---------|
| 74166  | TMEM38A           | transmembrane protein 38A                                | 0.0171832   | 1.71796 |
| 213417 | KLHDC8A           | kelch domain containing 8A                               | 0.0182051   | 1.716   |
| 96957  | TMEM62            | transmembrane protein 62                                 | 0.00261141  | 1.71245 |
| 108079 | PRKAA2            | protein kinase, AMP-activated, alpha 2 catalytic subunit | 0.00567005  | 1.71243 |
| 93677  | LMOD2             | leiomodoin 2 (cardiac)                                   | 0.00687628  | 1.71198 |
| 11472  | ACTN2             | actinin, alpha 2                                         | 0.00110543  | 1.70651 |
| 12299  | CACNG1            | calcium channel, voltage-dependent, gamma subunit 1      | 0.00244568  | 1.70373 |
| 12865  | COX7A1            | cytochrome c oxidase subunit VIIa polypeptide 1 (muscle) | 0.0327936   | 1.69016 |
| 15394  | HOXA1             | homeobox A1                                              | 0.0017695   | 1.68817 |
| 24131  | LDB3              | LIM domain binding 3                                     | 0.00290847  | 1.68674 |
| 216198 | TCP11L2           | t-complex 11 (mouse)-like 2                              | 0.0233682   | 1.68587 |
| 22393  | WFS1              | Wolfram syndrome 1 (wolframin)                           | 0.0125994   | 1.68571 |
| 59006  | MYOZ2             | myozenin 2                                               | 0.000859941 | 1.68434 |
| 57754  | CEND1             | cell cycle exit and neuronal differentiation 1           | 0.00361503  | 1.67859 |
| 52639  | WIP1              | WD repeat domain, phosphoinositide interacting 1         | 0.00390392  | 1.67561 |
| 207278 | FCHSD2            | FCH and double SH3 domains 2                             | 0.00427515  | 1.67525 |
| 83921  | TMEM2             | transmembrane protein 2                                  | 0.00940257  | 1.67425 |
| 57339  | JPH1              | junctionophilin 1                                        | 0.000631388 | 1.67413 |
| 21859  | TIMP3             | TIMP metalloproteinase inhibitor 3                       | 0.00508909  | 1.67392 |
| 70598  | FILIP1            | filamin A interacting protein 1                          | 0.0454447   | 1.67237 |
| 27273  | PDK4              | pyruvate dehydrogenase kinase, isozyme 4                 | 0.000765111 | 1.67191 |
| 77674  | DEFB105A/DEFB105B | defensin, beta 105A                                      | 0.0480363   | 1.66861 |
| 17691  | SIK1              | salt-inducible kinase 1                                  | 0.000733889 | 1.66247 |
| 12484  | Cd24a             | CD24a antigen                                            | 0.00418138  | 1.66211 |
| 13405  | DMD               | dystrophin                                               | 0.00321267  | 1.66116 |
| 387609 | ZHX2              | zinc fingers and homeoboxes 2                            | 0.00222347  | 1.65951 |
| 52118  | Pvr               | poliovirus receptor                                      | 0.00019109  | 1.65748 |
| 13346  | DES               | desmin                                                   | 0.0374257   | 1.65478 |
| 68897  | DISP1             | dispatched homolog 1 (Drosophila)                        | 0.000455838 | 1.65307 |
| 22138  | TTN               | titin                                                    | 0.000945821 | 1.65168 |
| 225845 | PLA2G16           | phospholipase A2, group XVI                              | 0.00933626  | 1.65143 |
| 70355  | GPRC5C            | G protein-coupled receptor, family C, group 5, member C  | 0.00378024  | 1.65096 |
| 100213 | RUSC2             | RUN and SH3 domain containing 2                          | 0.000655975 | 1.64941 |
| 23882  | GADD45G           | growth arrest and DNA-damage-inducible, gamma            | 0.00952236  | 1.6464  |
| 18604  | PDK2              | pyruvate dehydrogenase kinase, isozyme 2                 | 0.0027698   | 1.64605 |
| 17472  | Gbp4              | guanylate binding protein 4                              | 0.00545719  | 1.64313 |
| 23965  | ODZ3              | odz, odd Oz/ten-m homolog 3 (Drosophila)                 | 0.000704112 | 1.643   |

|        |                               |                                                              |             |         |
|--------|-------------------------------|--------------------------------------------------------------|-------------|---------|
| 76884  | CYFIP2                        | cytoplasmic FMR1 interacting protein 2                       | 0.0000666   | 1.64226 |
| 71436  | FLRT3                         | fibronectin leucine rich transmembrane protein 3             | 0.00667861  | 1.63872 |
| 17281  | FYCO1                         | FYVE and coiled-coil domain containing 1                     | 0.00638371  | 1.63832 |
| 103172 | CHCHD10                       | coiled-coil-helix-coiled-coil-helix domain containing 10     | 0.00056768  | 1.63803 |
| 14758  | GPM6B                         | glycoprotein M6B                                             | 0.0264856   | 1.63688 |
| 244923 | KLHL31                        | kelch-like 31 (Drosophila)                                   | 0.00558703  | 1.63674 |
| 97114  | HIST2H3C<br>(includes others) | histone cluster 2, H3c                                       | 0.0259114   | 1.63648 |
| 100732 | MAPRE3                        | microtubule-associated protein, RP/EB family, member 3       | 0.00118456  | 1.63249 |
| 59069  | TPM3                          | tropomyosin 3                                                | 0.0036305   | 1.63241 |
| 74480  | SAMD4A                        | sterile alpha motif domain containing 4A                     | 0.000129053 | 1.63108 |
| 23945  | MGLL                          | monoglyceride lipase                                         | 0.0291552   | 1.63085 |
| 79221  | Hdac9<br>(mouse)              | histone deacetylase 9                                        | 0.0244947   | 1.63049 |
| 21414  | TCF7                          | transcription factor 7 (T-cell specific, HMG-box)            | 0.00387154  | 1.63032 |
| 17883  | MYH3                          | myosin, heavy chain 3, skeletal muscle, embryonic            | 0.00232444  | 1.62533 |
| 12292  | CACNA1S                       | calcium channel, voltage-dependent, L type, alpha 1S subunit | 0.0149537   | 1.62333 |
| 17938  | Naca                          | nascent polypeptide-associated complex alpha polypeptide     | 0.0012099   | 1.62286 |
| 23959  | NT5E                          | 5'-nucleotidase, ecto (CD73)                                 | 0.0146751   | 1.62117 |
| 20965  | SYN2                          | synapsin II                                                  | 0.00349007  | 1.61601 |
| 75695  | RILPL1                        | Rab interacting lysosomal protein-like 1                     | 0.00923783  | 1.61563 |
| 73341  | ARHGEF6                       | Rac/Cdc42 guanine nucleotide exchange factor (GEF) 6         | 0.00427603  | 1.61267 |
| 21384  | TBX15                         | T-box 15                                                     | 0.00640933  | 1.6116  |
| 18741  | PITX2                         | paired-like homeodomain 2                                    | 0.00516442  | 1.61153 |
| 11870  | ART1                          | ADP-ribosyltransferase 1                                     | 0.0262132   | 1.6085  |
| 320138 | A130050O07R<br>ik             | RIKEN cDNA A130050O07 gene                                   | 0.0173964   | 1.608   |
| 384061 | FNDC5                         | fibronectin type III domain containing 5                     | 0.0027873   | 1.60594 |
| 12837  | COL8A1                        | collagen, type VIII, alpha 1                                 | 0.000612025 | 1.60505 |
| 18175  | NRAP                          | nebulin-related anchoring protein                            | 0.00391728  | 1.60328 |
| 69219  | DDAH1                         | dimethylarginine dimethylaminohydrolase 1                    | 0.00133342  | 1.60258 |
| 74020  | CPNE4                         | copine IV                                                    | 0.0168654   | 1.60113 |
| 65255  | ASB4                          | ankyrin repeat and SOCS box containing 4                     | 0.00512895  | 1.60018 |
| 77480  | KIDINS220                     | kinase D-interacting substrate, 220kDa                       | 0.017291    | 1.59949 |
| 11475  | ACTA2                         | actin, alpha 2, smooth muscle, aorta                         | 0.00191743  | 1.59935 |
| 21413  | TCF4                          | transcription factor 4                                       | 0.00839233  | 1.59921 |
| 380928 | LMO7                          | LIM domain 7                                                 | 0.00170705  | 1.59541 |
| 15464  | HRC                           | histidine rich calcium binding protein                       | 0.00178058  | 1.5953  |
| 216459 | MYL6B                         | myosin, light chain 6B, alkali, smooth                       | 0.00323023  | 1.59384 |

|        |                              |                                                                                        |             |         |
|--------|------------------------------|----------------------------------------------------------------------------------------|-------------|---------|
|        |                              | muscle and non-muscle                                                                  |             |         |
| 11852  | RHOB                         | ras homolog family member B                                                            | 0.00034727  | 1.59364 |
| 60525  | ACSS2                        | acyl-CoA synthetase short-chain family member 2                                        | 0.0202471   | 1.59184 |
| 68760  | SYNPO2L                      | synaptopodin 2-like                                                                    | 0.0040866   | 1.59131 |
| 23859  | DLG2                         | discs, large homolog 2 (Drosophila)                                                    | 0.00559549  | 1.5891  |
| 108151 | SEMA3D                       | sema domain, immunoglobulin domain (Ig), short basic domain, secreted, (semaphorin) 3D | 0.0268462   | 1.58614 |
| 13601  | ECM1 (includes EG:100332249) | extracellular matrix protein 1                                                         | 0.00209729  | 1.58382 |
| 320502 | LMOD3                        | leiomodrin 3 (fetal)                                                                   | 0.00062929  | 1.58354 |
| 16560  | KIF1A                        | kinesin family member 1A                                                               | 0.0052634   | 1.58261 |
| 16324  | INHBB                        | inhibin, beta B                                                                        | 0.00458312  | 1.58145 |
| 12876  | CPE                          | carboxypeptidase E                                                                     | 0.00209578  | 1.58022 |
| 60440  | ligp1                        | interferon inducible GTPase 1                                                          | 0.017629    | 1.58015 |
| 94092  | TRIM16                       | tripartite motif containing 16                                                         | 0.00131     | 1.57966 |
| 73710  | TUBB2B                       | tubulin, beta 2B class IIb                                                             | 0.010933    | 1.57316 |
| 13617  | EDNRA                        | endothelin receptor type A                                                             | 0.0174436   | 1.57286 |
| 73635  | Ptges3l                      | prostaglandin E synthase 3 (cytosolic)-like                                            | 0.0332316   | 1.57224 |
| 68024  | HIST2H2BE (includes others)  | histone cluster 2, H2be                                                                | 0.0145347   | 1.5713  |
| 16842  | LEF1                         | lymphoid enhancer-binding factor 1                                                     | 0.00202486  | 1.57084 |
| 236573 | Gbp6 (includes others)       | guanylate binding protein 6                                                            | 0.00331456  | 1.57043 |
| 15273  | HIVEP2                       | human immunodeficiency virus type I enhancer binding protein 2                         | 0.0160649   | 1.56883 |
| 12391  | CAV3                         | caveolin 3                                                                             | 0.00330112  | 1.56874 |
| 11459  | ACTA1                        | actin, alpha 1, skeletal muscle                                                        | 0.0206977   | 1.56784 |
| 228836 | DLGAP4                       | discs, large (Drosophila) homolog-associated protein 4                                 | 0.0000657   | 1.56744 |
| 241035 | PKHD1                        | polycystic kidney and hepatic disease 1 (autosomal recessive)                          | 0.0103972   | 1.56519 |
| 20257  | STMN2                        | stathmin-like 2                                                                        | 0.00744066  | 1.5643  |
| 72333  | PALLD                        | palladin, cytoskeletal associated protein                                              | 0.00459838  | 1.56382 |
| 21912  | TSPAN7                       | tetraspanin 7                                                                          | 0.000174961 | 1.55949 |
| 78388  | MVP                          | major vault protein                                                                    | 0.0100685   | 1.55708 |
| 56437  | RRAD                         | Ras-related associated with diabetes                                                   | 0.00979505  | 1.54897 |
| 68794  | FLNC                         | filamin C, gamma                                                                       | 0.00869274  | 1.54878 |
| 217030 | Synrg                        | synergin, gamma                                                                        | 0.000058    | 1.54861 |
| 66106  | SMPX                         | small muscle protein, X-linked                                                         | 0.0000874   | 1.5474  |
| 12874  | CPD                          | carboxypeptidase D                                                                     | 0.0095885   | 1.54688 |
| 74325  | CLTB                         | clathrin, light chain B                                                                | 0.0286161   | 1.54646 |
| 23794  | ADAMTS5                      | ADAM metallopeptidase with thrombospondin type 1 motif, 5                              | 0.00184079  | 1.54595 |

|        |               |                                                                              |             |         |
|--------|---------------|------------------------------------------------------------------------------|-------------|---------|
| 791403 | D830015G02Rik | RIKEN cDNA D830015G02 gene                                                   | 0.0200143   | 1.54561 |
| 23821  | BACE1         | beta-site APP-cleaving enzyme 1                                              | 0.00656703  | 1.54517 |
| 329828 | KIAA1161      | KIAA1161                                                                     | 0.00788041  | 1.54477 |
| 19017  | PPARGC1A      | peroxisome proliferator-activated receptor gamma, coactivator 1 alpha        | 0.00209241  | 1.54196 |
| 53318  | Pdlim3        | PDZ and LIM domain 3                                                         | 0.00116355  | 1.54049 |
| 69563  | 2310015B20Rik | RIKEN cDNA 2310015B20 gene                                                   | 0.00168896  | 1.5389  |
| 54338  | SLC23A2       | solute carrier family 23 (nucleobase transporters), member 2                 | 0.0119598   | 1.53783 |
| 19165  | PSEN2         | presenilin 2 (Alzheimer disease 4)                                           | 0.00857632  | 1.53727 |
| 109620 | DSP           | desmoplakin                                                                  | 0.00781287  | 1.53633 |
| 66734  | MAP1LC3A      | microtubule-associated protein 1 light chain 3 alpha                         | 0.00681852  | 1.53443 |
| 11363  | ACADL         | acyl-CoA dehydrogenase, long chain                                           | 0.00290486  | 1.53352 |
| 12913  | CREB3         | cAMP responsive element binding protein 3                                    | 0.000419368 | 1.53302 |
| 19200  | PSTPIP1       | proline-serine-threonine phosphatase interacting protein 1                   | 0.00517283  | 1.53214 |
| 17885  | MYH8          | myosin, heavy chain 8, skeletal muscle, perinatal                            | 0.000986156 | 1.53149 |
| 207181 | RBMS3         | RNA binding motif, single stranded interacting protein 3                     | 0.00230876  | 1.53113 |
| 12955  | CRYAB         | crystallin, alpha B                                                          | 0.000455682 | 1.52976 |
| 140491 | PPP1R3A       | protein phosphatase 1, regulatory subunit 3A                                 | 0.00232037  | 1.5287  |
| 237928 | PHOSPHO1      | phosphatase, orphan 1                                                        | 0.00354842  | 1.5281  |
| 12373  | CASQ2         | calsequestrin 2 (cardiac muscle)                                             | 0.00220554  | 1.52807 |
| 17884  | MYH4          | myosin, heavy chain 4, skeletal muscle                                       | 0.00343941  | 1.52606 |
| 243743 | PLXNA4        | plexin A4                                                                    | 0.0171535   | 1.52534 |
| 140781 | MYH7          | myosin, heavy chain 7, cardiac muscle, beta                                  | 0.00565161  | 1.52504 |
| 66659  | ACP6          | acid phosphatase 6, lysophosphatidic                                         | 0.0039307   | 1.5215  |
| 71841  | 1700008I05Rik | RIKEN cDNA 1700008I05 gene                                                   | 0.00261098  | 1.52143 |
| 387565 | CD300C        | CD300c molecule                                                              | 0.00062165  | 1.52016 |
| 20928  | ABCC9         | ATP-binding cassette, sub-family C (CFTR/MRP), member 9                      | 0.00246201  | 1.51966 |
| 18198  | MUSK          | muscle, skeletal, receptor tyrosine kinase                                   | 0.0139482   | 1.51815 |
| 211945 | PLEKHH1       | pleckstrin homology domain containing, family H (with MyTH4 domain) member 1 | 0.0079588   | 1.51481 |
| 66139  | TMEM8C        | transmembrane protein 8C                                                     | 0.00515523  | 1.51447 |
| 56421  | PFKP          | phosphofructokinase, platelet                                                | 0.00182749  | 1.51289 |
| 74100  | ARPP21        | cAMP-regulated phosphoprotein, 21kDa                                         | 0.0158294   | 1.51189 |
| 12575  | CDKN1A        | cyclin-dependent kinase inhibitor 1A (p21, Cip1)                             | 0.00300226  | 1.51187 |
| 68813  | DOCK5         | dedicator of cytokinesis 5                                                   | 0.0288971   | 1.51037 |
| 65256  | ASB2          | ankyrin repeat and SOCS box containing 2                                     | 0.0179391   | 1.51023 |



|        |                          |                                                           |             |          |
|--------|--------------------------|-----------------------------------------------------------|-------------|----------|
| 13982  | ESR1                     | estrogen receptor 1                                       | 0.0391279   | 1.50949  |
| 13009  | CSRP3                    | cysteine and glycine-rich protein 3 (cardiac LIM protein) | 0.0010911   | 1.50938  |
| 16568  | KIF3A                    | kinesin family member 3A                                  | 0.027936    | 1.50887  |
| 21952  | TNNI1                    | troponin I type 1 (skeletal, slow)                        | 0.0124095   | 1.50867  |
| 13197  | GADD45A                  | growth arrest and DNA-damage-inducible, alpha             | 0.000706517 | 1.50856  |
| 17872  | PPP1R15A                 | protein phosphatase 1, regulatory subunit 15A             | 0.00722251  | 1.50772  |
| 85031  | PLA1A                    | phospholipase A1 member A                                 | 0.000131737 | 1.5066   |
| 240752 | PIK3C2B                  | phosphoinositide-3-kinase, class 2, beta polypeptide      | 0.00661611  | 1.50621  |
| 20454  | ST3GAL5                  | ST3 beta-galactoside alpha-2,3-sialyltransferase 5        | 0.00223347  | 1.50537  |
| 22779  | IKZF2                    | IKAROS family zinc finger 2 (Helios)                      | 0.0448407   | 1.50523  |
| 210853 | ZNF548                   | zinc finger protein 548                                   | 0.0272629   | 1.50165  |
| 93960  | NKD1                     | naked cuticle homolog 1 (Drosophila)                      | 0.00366315  | 1.50069  |
| 108671 | DNAJC9                   | DnaJ (Hsp40) homolog, subfamily C, member 9               | 0.00725025  | -1.50019 |
| 20810  | SRM                      | spermidine synthase                                       | 0.00195816  | -1.50125 |
| 53978  | LPAR2                    | lysophosphatidic acid receptor 2                          | 0.00655986  | -1.50349 |
| 19891  | RPA2                     | replication protein A2, 32kDa                             | 0.0092381   | -1.50487 |
| 216829 | Mmg2                     | membrane magnesium transporter 2                          | 0.00316314  | -1.50599 |
| 18049  | NGF                      | nerve growth factor (beta polypeptide)                    | 0.00342572  | -1.50632 |
| 12545  | CDC7 (includes EG:12545) | cell division cycle 7 homolog (S, cerevisiae)             | 0.00666782  | -1.50654 |
| 52626  | CDKN2AIPNL               | CDKN2A interacting protein N-terminal like                | 0.00631464  | -1.5066  |
| 170753 | ZNF704                   | zinc finger protein 704                                   | 0.00463775  | -1.50676 |
| 57913  | PIDD                     | p53-induced death domain protein                          | 0.000708767 | -1.50788 |
| 76453  | PRSS23                   | protease, serine, 23                                      | 0.00155819  | -1.50807 |
| 73327  | PRADC1                   | protease-associated domain containing 1                   | 0.0367675   | -1.50845 |
| 66520  | 2610001J05Rik            | RIKEN cDNA 2610001J05 gene                                | 0.000266089 | -1.51268 |
| 67144  | LRRC40                   | leucine rich repeat containing 40                         | 0.0000311   | -1.51641 |
| 20583  | SNAI2                    | snail homolog 2 (Drosophila)                              | 0.00219479  | -1.51831 |
| 319176 | HIST2H2AC                | histone cluster 2, H2ac                                   | 0.00963475  | -1.51972 |
| 11764  | AP1B1                    | adaptor-related protein complex 1, beta 1 subunit         | 0.001541    | -1.52045 |
| 545555 | Gm5853                   | predicted gene 5853                                       | 0.0492912   | -1.52072 |
| 67865  | RGS10                    | regulator of G-protein signaling 10                       | 0.0246458   | -1.52118 |
| 669393 | Gm9457                   | predicted gene 9457                                       | 0.0449095   | -1.52536 |
| 51788  | H2AFZ                    | H2A histone family, member Z                              | 0.00304177  | -1.52603 |
| 21917  | TMPO                     | thymopoietin                                              | 0.00272575  | -1.52771 |
| 13178  | DCK                      | deoxycytidine kinase                                      | 0.00155888  | -1.5279  |
| 102141 | SNX25                    | sorting nexin 25                                          | 0.0036018   | -1.52862 |
| 78833  | GINS3                    | GINS complex subunit 3 (Psf3 homolog)                     | 0.0050487   | -1.53028 |

|           |                              |                                                                                     |             |          |
|-----------|------------------------------|-------------------------------------------------------------------------------------|-------------|----------|
| 50709     | HIST1H1E                     | histone cluster 1, H1e                                                              | 0.0422824   | -1.53073 |
| 20197     | S100A3                       | S100 calcium binding protein A3                                                     | 0.00612537  | -1.53261 |
| 29870     | GTSE1                        | G-2 and S-phase expressed 1                                                         | 0.00864012  | -1.53278 |
| 53618     | FUT8                         | fucosyltransferase 8 (alpha (1,6) fucosyltransferase)                               | 0.00908036  | -1.53284 |
| 14615     | GJC1                         | gap junction protein, gamma 1, 45kDa                                                | 0.000195816 | -1.53326 |
| 21749     | TERF1                        | telomeric repeat binding factor (NIMA-interacting) 1                                | 0.0137417   | -1.53451 |
| 17865     | MYBL2                        | v-myb myeloblastosis viral oncogene homolog (avian)-like 2                          | 0.00349949  | -1.5348  |
| 53881     | SLC5A3                       | solute carrier family 5 (sodium/myo-inositol cotransporter), member 3               | 0.000410094 | -1.53516 |
| 83398     | NDST3                        | N-deacetylase/N-sulfotransferase (heparan glucosaminyl) 3                           | 0.00394338  | -1.53891 |
| 20359     | SEMA6B                       | sema domain, transmembrane domain (TM), and cytoplasmic domain, (semaphorin) 6B     | 0.00830859  | -1.53896 |
| 19659     | RBP1                         | retinol binding protein 1, cellular                                                 | 0.0181838   | -1.53917 |
| 70640     | DCP2 (includes EG:100534849) | DCP2 decapping enzyme homolog (S, cerevisiae)                                       | 0.00535056  | -1.5403  |
| 72649     | TMEM209                      | transmembrane protein 209                                                           | 0.017549    | -1.541   |
| 72486     | RNF219                       | ring finger protein 219                                                             | 0.000231334 | -1.5423  |
| 51869     | RIF1 (includes EG:295602)    | RAP1 interacting factor homolog (yeast)                                             | 0.00183895  | -1.54258 |
| 110175    | GGCT                         | gamma-glutamylcyclotransferase                                                      | 0.0293113   | -1.54571 |
| 56363     | TMEFF2                       | transmembrane protein with EGF-like and two follistatin-like domains 2              | 0.0112034   | -1.54637 |
| 14186     | FGFR4                        | fibroblast growth factor receptor 4                                                 | 0.015615    | -1.54703 |
| 234344    | Gm2027/Naf1                  | nuclear assembly factor 1 homolog (S, cerevisiae)                                   | 0.0158892   | -1.5475  |
| 12499     | ENTPD5                       | ectonucleoside triphosphate diphosphohydrolase 5                                    | 0.0020852   | -1.54814 |
| 654459    | DEFB124                      | defensin, beta 124                                                                  | 0.0410987   | -1.5495  |
| 12401     | SERPINA6                     | serpin peptidase inhibitor, clade A (alpha-1 antiproteinase, antitrypsin), member 6 | 0.0141415   | -1.55056 |
| 100503799 | HMGN2                        | high mobility group nucleosomal binding domain 2                                    | 0.0234515   | -1.5506  |
| 12144     | BLM                          | Bloom syndrome, RecQ helicase-like                                                  | 0.002074    | -1.55185 |
| 319565    | SYNE2                        | spectrin repeat containing, nuclear envelope 2                                      | 0.00177004  | -1.55385 |
| 70358     | STEAP1                       | six transmembrane epithelial antigen of the prostate 1                              | 0.00128736  | -1.55401 |
| 70385     | CCDC99                       | coiled-coil domain containing 99                                                    | 0.029331    | -1.55422 |
| 326620    | Hist2h4 (includes others)    | histone cluster 2, H4                                                               | 0.0408716   | -1.55596 |
| 18576     | PDE3B                        | phosphodiesterase 3B, cGMP-inhibited                                                | 0.00425244  | -1.55688 |
| 100042069 | IMPDH2                       | IMP (inosine 5'-monophosphate) dehydrogenase 2                                      | 0.00224177  | -1.55804 |

|               |                                |                                                                                         |             |          |
|---------------|--------------------------------|-----------------------------------------------------------------------------------------|-------------|----------|
| 22021         | TPST1                          | tyrosylprotein sulfotransferase 1                                                       | 0.00619565  | -1.55883 |
| 20472         | SIX2                           | SIX homeobox 2                                                                          | 0.00275897  | -1.56101 |
| 21853         | TIMELESS                       | timeless homolog (Drosophila)                                                           | 0.0274066   | -1.56105 |
| 65103         | ARL6IP6                        | ADP-ribosylation-like factor 6 interacting protein 6                                    | 0.00179685  | -1.56107 |
| 16881         | LIG1                           | ligase I, DNA, ATP-dependent                                                            | 0.000166998 | -1.56161 |
| 66953         | Cdca7                          | cell division cycle associated 7                                                        | 0.000113247 | -1.56329 |
| 66194         | PYCRL                          | pyrroline-5-carboxylate reductase-like                                                  | 0.0186863   | -1.56541 |
| 57441         | GMNN                           | geminin, DNA replication inhibitor                                                      | 0.0337822   | -1.56629 |
| 381306        | C1orf112                       | chromosome 1 open reading frame 112                                                     | 0.00225201  | -1.56648 |
| 14841         | GSG2                           | germ cell associated 2 (haspin)                                                         | 0.017842    | -1.56651 |
| 208836        | FANCI                          | Fanconi anemia, complementation group I                                                 | 0.00314066  | -1.56662 |
| 244810        | AW551984                       | expressed sequence AW551984                                                             | 0.000136591 | -1.5667  |
| 19362         | RAD51AP1                       | RAD51 associated protein 1                                                              | 0.000745744 | -1.56722 |
| 58184         | RQCD1                          | RCD1 required for cell differentiation1 homolog (S, pombe)                              | 0.00406265  | -1.56857 |
| 107732        | MRPL10<br>(includes EG:107732) | mitochondrial ribosomal protein L10                                                     | 0.00164619  | -1.56927 |
| 14677         | GNAI1                          | guanine nucleotide binding protein (G protein), alpha inhibiting activity polypeptide 1 | 0.00185544  | -1.57116 |
| 16177         | IL1R1                          | interleukin 1 receptor, type I                                                          | 0.0054712   | -1.57177 |
| 20514         | SLC1A5                         | solute carrier family 1 (neutral amino acid transporter), member 5                      | 0.000940856 | -1.5736  |
| 66191         | IER3IP1                        | immediate early response 3 interacting protein 1                                        | 0.00352205  | -1.57419 |
| 13433         | DNMT1                          | DNA (cytosine-5-)-methyltransferase 1                                                   | 0.00121442  | -1.5755  |
| 66521         | RWDD1                          | RWD domain containing 1                                                                 | 0.00117944  | -1.57836 |
| 58207         | SLC43A3                        | solute carrier family 43, member 3                                                      | 0.0019615   | -1.57961 |
| 238455        | MACC1                          | metastasis associated in colon cancer 1                                                 | 0.00828782  | -1.5798  |
| 100041<br>948 | Gm9800                         | predicted gene 9800                                                                     | 0.00679265  | -1.58042 |
| 68145         | ETAA1                          | Ewing tumor-associated antigen 1                                                        | 0.000730618 | -1.58206 |
| 14229         | FKBP5                          | FK506 binding protein 5                                                                 | 0.00231143  | -1.58275 |
| 230376        | HAUS6                          | HAUS augmin-like complex, subunit 6                                                     | 0.00542685  | -1.5867  |
| 110052        | DEK                            | DEK oncogene                                                                            | 0.000122651 | -1.58758 |
| 64074         | SMOC2                          | SPARC related modular calcium binding 2                                                 | 0.00461287  | -1.58839 |
| 69928         | APITD1                         | apoptosis-inducing, TAF9-like domain 1                                                  | 0.0174779   | -1.58896 |
| 18974         | POLE2                          | polymerase (DNA directed), epsilon 2, accessory subunit                                 | 0.00060799  | -1.58951 |
| 56473         | FADS2                          | fatty acid desaturase 2                                                                 | 0.0023667   | -1.59056 |
| 71566         | CLMP                           | CXADR-like membrane protein                                                             | 0.000701948 | -1.59198 |
| 235559        | TOPBP1                         | topoisomerase (DNA) II binding protein 1                                                | 0.000140276 | -1.59433 |
| 14609         | GJA1                           | gap junction protein, alpha 1, 43kDa                                                    | 0.000965681 | -1.5949  |
| 68895         | RASL11A                        | RAS-like, family 11, member A                                                           | 0.0025361   | -1.59557 |
| 237221        | GEMIN8                         | gem (nuclear organelle) associated                                                      | 0.00218283  | -1.59884 |

|               |                                | protein 8                                                     |             |          |
|---------------|--------------------------------|---------------------------------------------------------------|-------------|----------|
| 217946        | CDCA7L                         | cell division cycle associated 7-like                         | 0.00967878  | -1.60117 |
| 12390         | CAV2                           | caveolin 2                                                    | 0.00168136  | -1.60421 |
| 27756         | LSM2                           | LSM2 homolog, U6 small nuclear RNA associated (S, cerevisiae) | 0.00457618  | -1.61079 |
| 11789         | APC                            | adenomatous polyposis coli                                    | 0.00975878  | -1.61156 |
| 106344        | RFC4                           | replication factor C (activator 1) 4, 37kDa                   | 0.0170358   | -1.61171 |
| 100529<br>074 | Snora33                        | small nucleolar RNA, H/ACA box 33                             | 0.0180858   | -1.61295 |
| 19736         | RGS4                           | regulator of G-protein signaling 4                            | 0.00176044  | -1.61322 |
| 26934         | RACGAP1                        | Rac GTPase activating protein 1                               | 0.0141165   | -1.61592 |
| 54124         | CKS1B                          | CDC28 protein kinase regulatory subunit 1B                    | 0.000788539 | -1.61701 |
| 230594        | ZCCHC11                        | zinc finger, CCHC domain containing 11                        | 0.00174346  | -1.61804 |
| 18005         | NEK2                           | NIMA (never in mitosis gene a)-related kinase 2               | 0.00364837  | -1.61862 |
| 22367         | VRK1                           | vaccinia related kinase 1                                     | 0.00320418  | -1.61897 |
| 73254         | CCDC18                         | coiled-coil domain containing 18                              | 0.00209631  | -1.61947 |
| 17220         | MCM7                           | minichromosome maintenance complex component 7                | 0.00773833  | -1.62174 |
| 241627        | WDR76                          | WD repeat domain 76                                           | 0.00874405  | -1.6221  |
| 108912        | CDCA2                          | cell division cycle associated 2                              | 0.000234676 | -1.62211 |
| 66949         | TRIM59                         | tripartite motif containing 59                                | 0.00321352  | -1.62259 |
| 15270         | H2AFX                          | H2A histone family, member X                                  | 0.00651738  | -1.62375 |
| 20492         | SLBP                           | stem-loop binding protein                                     | 0.00744193  | -1.62423 |
| 19650         | RBL1                           | retinoblastoma-like 1 (p107)                                  | 0.000269219 | -1.62602 |
| 269582        | CLSPN                          | claspin                                                       | 0.0014411   | -1.62722 |
| 66195         | Lce1g                          | late cornified envelope 1G                                    | 0.0321382   | -1.62728 |
| 13537         | DUSP2                          | dual specificity phosphatase 2                                | 0.00458094  | -1.6278  |
| 104307        | RNU12                          | RNA, U12 small nuclear                                        | 0.00745529  | -1.62902 |
| 53381         | PRDX4                          | peroxiredoxin 4                                               | 0.0099241   | -1.62916 |
| 231123        | HAUS3                          | HAUS augmin-like complex, subunit 3                           | 0.0116663   | -1.63444 |
| 12519         | CD80<br>(includes<br>EG:12519) | CD80 molecule                                                 | 0.000682559 | -1.63507 |
| 319180        | HIST1H2BL                      | histone cluster 1, H2bl                                       | 0.0169671   | -1.63601 |
| 66634         | MCM8                           | minichromosome maintenance complex component 8                | 0.00132889  | -1.63889 |
| 106582        | NRM                            | nurim (nuclear envelope membrane protein)                     | 0.0123911   | -1.6393  |
| 30953         | IQCJ-SCHIP1                    | IQCJ-SCHIP1 readthrough                                       | 0.0309604   | -1.64363 |
| 18817         | PLK1                           | polo-like kinase 1                                            | 0.00347358  | -1.64566 |
| 12449         | CCNF                           | cyclin F                                                      | 0.00122505  | -1.64576 |
| 209334        | GEN1                           | Gen endonuclease homolog 1 (Drosophila)                       | 0.0495063   | -1.64898 |
| 13835         | EPHA1                          | EPH receptor A1                                               | 0.00162712  | -1.64997 |
| 100306<br>944 | Snora73a                       | small nucleolar RNA, H/ACA box 73a                            | 0.0147846   | -1.65083 |

|        |                             |                                                                                               |             |          |
|--------|-----------------------------|-----------------------------------------------------------------------------------------------|-------------|----------|
| 12544  | CDC45                       | cell division cycle 45 homolog (S, cerevisiae)                                                | 0.000642738 | -1.65104 |
| 27528  | NREP                        | neuronal regeneration related protein homolog (rat)                                           | 0.0057288   | -1.65276 |
| 66570  | CENPM                       | centromere protein M                                                                          | 0.00756723  | -1.65328 |
| 319156 | Hist2h4 (includes others)   | histone cluster 2, H4                                                                         | 0.00203332  | -1.65367 |
| 211666 | MGST2                       | microsomal glutathione S-transferase 2                                                        | 0.00481721  | -1.65396 |
| 70218  | KIF18B                      | kinesin family member 18B                                                                     | 0.000291524 | -1.65423 |
| 76477  | PCOLCE2 (includes EG:26577) | procollagen C-endopeptidase enhancer 2                                                        | 0.000836154 | -1.65773 |
| 76843  | DTL                         | denticleless E3 ubiquitin protein ligase homolog (Drosophila)                                 | 0.000274819 | -1.65845 |
| 629016 | Zfp953                      | zinc finger protein 953                                                                       | 0.0197846   | -1.66235 |
| 237911 | BRIP1                       | BRCA1 interacting protein C-terminal helicase 1                                               | 0.00756502  | -1.66461 |
| 106795 | TCF19                       | transcription factor 19                                                                       | 0.000604611 | -1.66831 |
| 66131  | TIPIN                       | TIMELESS interacting protein                                                                  | 0.00234018  | -1.66906 |
| 18140  | UHRF1                       | ubiquitin-like with PHD and ring finger domains 1                                             | 0.0354907   | -1.66998 |
| 16319  | INCENP                      | inner centromere protein antigens 135/155kDa                                                  | 0.00404773  | -1.67026 |
| 18787  | SERPINE1                    | serpin peptidase inhibitor, clade E (nexin, plasminogen activator inhibitor type 1), member 1 | 0.028646    | -1.67174 |
| 76509  | 1600029D21Rik               | RIKEN cDNA 1600029D21 gene                                                                    | 0.00430015  | -1.6763  |
| 319187 | HIST1H2BL                   | histone cluster 1, H2bl                                                                       | 0.00369848  | -1.67731 |
| 381318 | NSL1 (includes EG:25936)    | NSL1, MIND kinetochore complex component, homolog (S, cerevisiae)                             | 0.00582849  | -1.68139 |
| 66226  | TRAPPC2                     | trafficking protein particle complex 2                                                        | 0.035117    | -1.68272 |
| 52502  | CARHSP1                     | calcium regulated heat stable protein 1, 24kDa                                                | 0.00227266  | -1.6837  |
| 12189  | BRCA1                       | breast cancer 1, early onset                                                                  | 0.000765668 | -1.68666 |
| 12021  | BARD1                       | BRCA1 associated RING domain 1                                                                | 0.000786079 | -1.68815 |
| 69639  | EXOSC8                      | exosome component 8                                                                           | 0.000607605 | -1.68933 |
| 237886 | SLFN13                      | schlafen family member 13                                                                     | 0.0233733   | -1.69249 |
| 74041  | C11orf82                    | chromosome 11 open reading frame 82                                                           | 0.0409056   | -1.69418 |
| 50927  | NASP                        | nuclear autoantigenic sperm protein (histone-binding)                                         | 0.000164138 | -1.70256 |
| 105988 | ESPL1                       | extra spindle pole bodies homolog 1 (S, cerevisiae)                                           | 0.00119149  | -1.70307 |
| 66578  | MIS18A                      | MIS18 kinetochore protein homolog A (S, pombe)                                                | 0.000206743 | -1.70534 |
| 12557  | CDH17                       | cadherin 17, LI cadherin (liver-intestine)                                                    | 0.0158154   | -1.71154 |
| 12534  | CDK1                        | cyclin-dependent kinase 1                                                                     | 0.00113746  | -1.71274 |
| 623474 | RAD54B                      | RAD54 homolog B (S, cerevisiae)                                                               | 0.00687065  | -1.7133  |
| 19699  | RELN                        | reelin                                                                                        | 0.00349165  | -1.71352 |
| 69706  | LRR1                        | leucine rich repeat protein 1                                                                 | 0.00560736  | -1.7145  |

|               |                          |                                                        |             |          |
|---------------|--------------------------|--------------------------------------------------------|-------------|----------|
| 107435        | HAT1                     | histone acetyltransferase 1                            | 0.000247509 | -1.7152  |
| 104625        | CNOT6                    | CCR4-NOT transcription complex, subunit 6              | 0.0005027   | -1.71761 |
| 665903        | Gm7846                   | predicted gene 7846                                    | 0.0202075   | -1.71961 |
| 17231         | Mcpt8                    | mast cell protease 8                                   | 0.00875095  | -1.72007 |
| 17219         | MCM6                     | minichromosome maintenance complex component 6         | 0.00091659  | -1.72171 |
| 69071         | TMEM97                   | transmembrane protein 97                               | 0.00933744  | -1.72532 |
| 100217<br>426 | Snord49b                 | small nucleolar RNA, C/D box 49B                       | 0.0305155   | -1.72776 |
| 114672        | 1700007E05Rik            | RIKEN cDNA 1700007E05 gene                             | 0.0195568   | -1.7295  |
| 16796         | LASP1                    | LIM and SH3 protein 1                                  | 0.0000896   | -1.73111 |
| 13361         | DHFR                     | dihydrofolate reductase                                | 0.00054634  | -1.73183 |
| 70472         | ATAD2                    | ATPase family, AAA domain containing 2                 | 0.000915289 | -1.73209 |
| 22329         | VCAM1                    | vascular cell adhesion molecule 1                      | 0.000516331 | -1.73278 |
| 23834         | CDC6 (includes EG:23834) | cell division cycle 6 homolog (S, cerevisiae)          | 0.0232603   | -1.73515 |
| 212377        | MMS22L                   | MMS22-like, DNA repair protein                         | 0.00367329  | -1.73794 |
| 22390         | WEE1                     | WEE1 homolog (S, pombe)                                | 0.00452515  | -1.73814 |
| 17470         | CD200                    | CD200 molecule                                         | 0.00157532  | -1.73822 |
| 13605         | ECT2                     | epithelial cell transforming sequence 2 oncogene       | 0.000705838 | -1.74049 |
| 70099         | SMC4                     | structural maintenance of chromosomes 4                | 0.000390878 | -1.74063 |
| 75623         | TEX30                    | testis expressed 30                                    | 0.0000561   | -1.74455 |
| 215387        | NCAPH                    | non-SMC condensin I complex, subunit H                 | 0.00112793  | -1.74544 |
| 67121         | MASTL                    | microtubule associated serine/threonine kinase-like    | 0.0102049   | -1.74577 |
| 72787         | TMEM48                   | transmembrane protein 48                               | 0.010715    | -1.7483  |
| 66336         | CENPP                    | centromere protein P                                   | 0.00408887  | -1.74937 |
| 12190         | BRCA2                    | breast cancer 2, early onset                           | 0.000799144 | -1.74938 |
| 208628        | KNTC1                    | kinetochore associated 1                               | 0.00812122  | -1.75399 |
| 258216        | OR5M9                    | olfactory receptor, family 5, subfamily M, member 9    | 0.028111    | -1.75431 |
| 56419         | DIAPH3                   | diaphanous homolog 3 (Drosophila)                      | 0.004639    | -1.75914 |
| 228421        | KIF18A                   | kinesin family member 18A                              | 0.0190174   | -1.75922 |
| 319186        | HIST1H2BD                | histone cluster 1, H2bd                                | 0.00224636  | -1.76065 |
| 17289         | MERTK                    | c-mer proto-oncogene tyrosine kinase                   | 0.00214402  | -1.76314 |
| 12649         | CHEK1                    | checkpoint kinase 1                                    | 0.00000819  | -1.76446 |
| 108000        | CENPF                    | centromere protein F, 350/400kDa (mitosin)             | 0.00017808  | -1.76468 |
| 218977        | DLGAP5                   | discs, large (Drosophila) homolog-associated protein 5 | 0.00429536  | -1.76698 |
| 225995        | C9orf40                  | chromosome 9 open reading frame 40                     | 0.00521728  | -1.77382 |
| 72544         | EXOSC6                   | exosome component 6                                    | 0.0101964   | -1.77728 |

|        |                                  |                                                                     |             |          |
|--------|----------------------------------|---------------------------------------------------------------------|-------------|----------|
| 19366  | RAD54L                           | RAD54-like (S, cerevisiae)                                          | 0.00134737  | -1.77815 |
| 83815  | CENPQ                            | centromere protein Q                                                | 0.0163273   | -1.77949 |
| 77011  | C15orf42                         | chromosome 15 open reading frame 42                                 | 0.0030939   | -1.77991 |
| 16906  | LMNB1                            | lamin B1                                                            | 0.00307135  | -1.78305 |
| 234258 | NEIL3                            | nei endonuclease VIII-like 3 (E, coli)                              | 0.0000351   | -1.78457 |
| 20873  | PLK4                             | polo-like kinase 4                                                  | 0.000391729 | -1.7856  |
| 72155  | CENPN                            | centromere protein N                                                | 0.00271371  | -1.78638 |
| 319182 | HIST1H2BM                        | histone cluster 1, H2bm                                             | 0.000492731 | -1.78797 |
| 97122  | Hist2h4<br>(includes<br>others)  | histone cluster 2, H4                                               | 0.00114752  | -1.79144 |
| 15366  | HMMR                             | hyaluronan-mediated motility receptor<br>(RHAMM)                    | 0.00750707  | -1.80083 |
| 107995 | CDC20<br>(includes<br>EG:107995) | cell division cycle 20 homolog (S,<br>cerevisiae)                   | 0.000699217 | -1.80233 |
| 71876  | MLF1IP                           | MLF1 interacting protein                                            | 0.00634726  | -1.80302 |
| 12904  | CRABP2                           | cellular retinoic acid binding protein 2                            | 0.00392568  | -1.80744 |
| 74107  | CEP55                            | centrosomal protein 55kDa                                           | 0.00618782  | -1.81025 |
| 14235  | FOXM1                            | forkhead box M1                                                     | 0.00847578  | -1.81191 |
| 70466  | CKAP2L                           | cytoskeleton associated protein 2-like                              | 0.00255785  | -1.81428 |
| 320910 | ITGB8                            | integrin, beta 8                                                    | 0.00388654  | -1.81544 |
| 20603  | SMS                              | spermine synthase                                                   | 0.0141356   | -1.8161  |
| 19348  | KIF20A                           | kinesin family member 20A                                           | 0.0019061   | -1.81796 |
| 69716  | TRIP13                           | thyroid hormone receptor interactor 13                              | 0.00185628  | -1.82151 |
| 224405 | CYYR1                            | cysteine/tyrosine-rich 1                                            | 0.00184819  | -1.82411 |
| 21335  | TACC3                            | transforming, acidic coiled-coil<br>containing protein 3            | 0.000488569 | -1.82455 |
| 68298  | NCAPD2                           | non-SMC condensin I complex, subunit<br>D2                          | 0.0000555   | -1.82483 |
| 17427  | MNS1                             | meiosis-specific nuclear structural 1                               | 0.000716935 | -1.828   |
| 12236  | BUB1B                            | budding uninhibited by benzimidazoles 1<br>homolog beta (yeast)     | 0.00135195  | -1.82804 |
| 12532  | CDC25C                           | cell division cycle 25 homolog C (S,<br>pombe)                      | 0.0139286   | -1.83055 |
| 18973  | POLE                             | polymerase (DNA directed), epsilon,<br>catalytic subunit            | 0.000591269 | -1.83254 |
| 66471  | ANP32E                           | acidic (leucine-rich) nuclear<br>phosphoprotein 32 family, member E | 0.000807137 | -1.83301 |
| 20088  | RPS24                            | ribosomal protein S24                                               | 0.0227385   | -1.83419 |
| 319183 | HIST1H2BL                        | histone cluster 1, H2bl                                             | 0.00273548  | -1.83424 |
| 268465 | EME1                             | essential meiotic endonuclease 1<br>homolog 1 (S, pombe)            | 0.000474514 | -1.8361  |
| 218973 | WDHD1                            | WD repeat and HMG-box DNA binding<br>protein 1                      | 0.000056    | -1.84368 |
| 17864  | MYBL1                            | v-myb myeloblastosis viral oncogene<br>homolog (avian)-like 1       | 0.00553324  | -1.84512 |
| 66468  | SKA1                             | spindle and kinetochore associated<br>complex subunit 1             | 0.0146459   | -1.84603 |
| 70454  | CENPL                            | centromere protein L                                                | 0.0165159   | -1.84663 |

|               |                            |                                                                                            |             |          |
|---------------|----------------------------|--------------------------------------------------------------------------------------------|-------------|----------|
| 17294         | MEST                       | mesoderm specific transcript homolog (mouse)                                               | 0.00159512  | -1.84717 |
| 67629         | SPC24 (includes EG:147841) | SPC24, NDC80 kinetochore complex component, homolog (S, cerevisiae)                        | 0.00221977  | -1.84904 |
| 27214         | DBF4 (includes EG:10926)   | DBF4 homolog (S, cerevisiae)                                                               | 0.0131154   | -1.85134 |
| 71988         | ESCO2                      | establishment of cohesion 1 homolog 2 (S, cerevisiae)                                      | 0.00361233  | -1.85197 |
| 20878         | AURKA                      | aurora kinase A                                                                            | 0.0000116   | -1.85246 |
| 100217<br>428 | Snord57                    | small nucleolar RNA, C/D box 57                                                            | 0.0358432   | -1.85847 |
| 56150         | MAD2L1                     | MAD2 mitotic arrest deficient-like 1 (yeast)                                               | 0.00925095  | -1.85865 |
| 319169        | Hist1h2ak                  | histone cluster 1, H2ak                                                                    | 0.00235578  | -1.85884 |
| 72119         | TPX2                       | TPX2, microtubule-associated, homolog (Xenopus laevis)                                     | 0.00123349  | -1.86032 |
| 20135         | RRM2                       | ribonucleotide reductase M2                                                                | 0.00158597  | -1.86066 |
| 51944         | C15orf23                   | chromosome 15 open reading frame 23                                                        | 0.00278667  | -1.86457 |
| 70546         | ZDHHC2                     | zinc finger, DHHC-type containing 2                                                        | 0.00696158  | -1.86494 |
| 100217<br>418 | Snora44                    | small nucleolar RNA, H/ACA box 44                                                          | 0.0268934   | -1.86743 |
| 54141         | SPAG5                      | sperm associated antigen 5                                                                 | 0.000809323 | -1.87198 |
| 60530         | FIGNL1                     | fidgetin-like 1                                                                            | 0.00265036  | -1.87416 |
| 69270         | GINS1                      | GINS complex subunit 1 (Psf1 homolog)                                                      | 0.00440366  | -1.88505 |
| 18968         | POLA1                      | polymerase (DNA directed), alpha 1, catalytic subunit                                      | 0.000707419 | -1.88928 |
| 66929         | ASF1B                      | ASF1 anti-silencing function 1 homolog B (S, cerevisiae)                                   | 0.00647675  | -1.89373 |
| 80838         | HIST1H1A                   | histone cluster 1, H1a                                                                     | 0.0000407   | -1.89537 |
| 236930        | ERCC6L                     | excision repair cross-complementing rodent repair deficiency, complementation group 6-like | 0.0000502   | -1.90857 |
| 14156         | FEN1                       | flap structure-specific endonuclease 1                                                     | 0.00420318  | -1.91094 |
| 12447         | CCNE1                      | cyclin E1                                                                                  | 0.000507915 | -1.91188 |
| 19737         | RGS5                       | regulator of G-protein signaling 5                                                         | 0.0000707   | -1.9138  |
| 12615         | CENPA                      | centromere protein A                                                                       | 0.0000786   | -1.91507 |
| 229841        | CENPE                      | centromere protein E, 312kDa                                                               | 0.000417236 | -1.91633 |
| 12442         | CCNB2                      | cyclin B2                                                                                  | 0.00195287  | -1.91649 |
| 20937         | SUV39H1                    | suppressor of variegation 3-9 homolog 1 (Drosophila)                                       | 0.0000811   | -1.92199 |
| 20419         | SHCBP1                     | SHC SH2-domain binding protein 1                                                           | 0.000171568 | -1.9239  |
| 17217         | MCM4                       | minichromosome maintenance complex component 4                                             | 0.000178922 | -1.92518 |
| 81535         | SGPP1                      | sphingosine-1-phosphate phosphatase 1                                                      | 0.00232527  | -1.93047 |
| 22171         | TYMS                       | thymidylate synthetase                                                                     | 0.000246501 | -1.9365  |
| 15201         | HELLS                      | helicase, lymphoid-specific                                                                | 0.000445735 | -1.93682 |
| 22137         | TTK                        | TTK protein kinase                                                                         | 0.00141935  | -1.93685 |



|        |                                   |                                                                                 |             |          |
|--------|-----------------------------------|---------------------------------------------------------------------------------|-------------|----------|
| 75317  | PARPBP                            | PARP1 binding protein                                                           | 0.0145418   | -1.93744 |
| 77744  | BORA                              | bora, aurora kinase A activator                                                 | 0.00264211  | -1.93883 |
| 18227  | NR4A2                             | nuclear receptor subfamily 4, group A, member 2                                 | 0.000563043 | -1.95309 |
| 102920 | CENPI                             | centromere protein I                                                            | 0.000459651 | -1.95488 |
| 237082 | NXT2                              | nuclear transport factor 2-like export factor 2                                 | 0.00288899  | -1.95676 |
| 67849  | CDCA5                             | cell division cycle associated 5                                                | 0.0367251   | -1.95798 |
| 67052  | NDC80                             | NDC80 kinetochore complex component homolog (S, cerevisiae)                     | 0.0039715   | -1.96273 |
| 68612  | UBE2C                             | ubiquitin-conjugating enzyme E2C                                                | 0.000283788 | -1.96273 |
| 52276  | CDCA8                             | cell division cycle associated 8                                                | 0.00523444  | -1.96542 |
| 26909  | EXO1<br>(includes EG:26909)       | exonuclease 1                                                                   | 0.000847912 | -1.96855 |
| 71878  | FAM83D                            | family with sequence similarity 83, member D                                    | 0.00344711  | -1.96857 |
| 214968 | SEMA6D                            | sema domain, transmembrane domain (TM), and cytoplasmic domain, (semaphorin) 6D | 0.0000164   | -1.96859 |
| 68743  | ANLN                              | anillin, actin binding protein                                                  | 0.000800437 | -1.97172 |
| 20460  | STIL                              | SCL/TAL1 interrupting locus                                                     | 0.0138745   | -1.97304 |
| 110074 | DUT                               | deoxyuridine triphosphatase                                                     | 0.000886517 | -1.97482 |
| 319155 | Hist2h4<br>(includes others)      | histone cluster 2, H4                                                           | 0.0223919   | -1.97484 |
| 66442  | SPC25<br>(includes EG:100144563 ) | SPC25, NDC80 kinetochore complex component, homolog (S, cerevisiae)             | 0.00342033  | -1.97572 |
| 71819  | KIF23                             | kinesin family member 23                                                        | 0.000433666 | -1.97646 |
| 68549  | SGOL2                             | shugoshin-like 2 (S, pombe)                                                     | 0.00339604  | -1.97876 |
| 19361  | RAD51                             | RAD51 homolog (S, cerevisiae)                                                   | 0.000582265 | -1.98078 |
| 26886  | CENPH                             | centromere protein H                                                            | 0.00158114  | -1.98111 |
| 17279  | MELK                              | maternal embryonic leucine zipper kinase                                        | 0.0000166   | -1.98786 |
| 21973  | TOP2A                             | topoisomerase (DNA) II alpha 170kDa                                             | 0.00384942  | -1.99042 |
| 76915  | MND1<br>(includes EG:295160)      | meiotic nuclear divisions 1 homolog (S, cerevisiae)                             | 0.017283    | -2.00352 |
| 240641 | KIF20B                            | kinesin family member 20B                                                       | 0.0000317   | -2.00373 |
| 54140  | AVPR1A                            | arginine vasopressin receptor 1A                                                | 0.00388708  | -2.00718 |
| 12316  | ASPM                              | asp (abnormal spindle) homolog, microcephaly associated (Drosophila)            | 0.0000615   | -2.01921 |
| 224171 | KIAA1524                          | KIAA1524                                                                        | 0.00270572  | -2.0196  |
| 108907 | NUSAP1                            | nucleolar and spindle associated protein 1                                      | 0.00229453  | -2.02429 |
| 68014  | ZWILCH                            | Zwilch, kinetochore associated, homolog (Drosophila)                            | 0.00099542  | -2.02503 |
| 56702  | HIST1H1B                          | histone cluster 1, H1b                                                          | 0.000913538 | -2.02534 |

|               |                                 |                                                                                   |             |          |
|---------------|---------------------------------|-----------------------------------------------------------------------------------|-------------|----------|
| 20877         | AURKB                           | aurora kinase B                                                                   | 0.0000224   | -2.02949 |
| 54392         | NCAPG                           | non-SMC condensin I complex, subunit G                                            | 0.0010791   | -2.03705 |
| 72415         | SGOL1                           | shugoshin-like 1 (S, pombe)                                                       | 0.000109904 | -2.03744 |
| 52009         | HN1L                            | hematological and neurological expressed 1-like                                   | 0.000622303 | -2.0392  |
| 110312        | PMCH                            | pro-melanin-concentrating hormone                                                 | 0.0363695   | -2.04138 |
| 217653        | MIS18BP1                        | MIS18 binding protein 1                                                           | 0.000411179 | -2.04544 |
| 100306<br>945 | Snora73b                        | small nucleolar RNA, H/ACA box 73b                                                | 0.000049    | -2.06587 |
| 14211         | SMC2                            | structural maintenance of chromosomes 2                                           | 0.000929779 | -2.07674 |
| 11799         | BIRC5                           | baculoviral IAP repeat containing 5                                               | 0.000253301 | -2.09193 |
| 80986         | CKAP2                           | cytoskeleton associated protein 2                                                 | 0.00114758  | -2.09417 |
| 270906        | PRR11                           | proline rich 11                                                                   | 0.00927803  | -2.10289 |
| 76044         | NCAPG2                          | non-SMC condensin II complex, subunit G2                                          | 0.000575951 | -2.10508 |
| 228482        | ARHGAP11A                       | Rho GTPase activating protein 11A                                                 | 0.00097615  | -2.12023 |
| 219114        | SKA3                            | spindle and kinetochore associated complex subunit 3                              | 0.00217176  | -2.12382 |
| 12448         | CCNE2                           | cyclin E2                                                                         | 0.00142332  | -2.12778 |
| 16551         | KIF11                           | kinesin family member 11                                                          | 0.000508656 | -2.13212 |
| 319189        | HIST2H2BF                       | histone cluster 2, H2bf                                                           | 0.00925049  | -2.16045 |
| 319172        | HIST1H2AB/HI<br>ST1H2AE         | histone cluster 1, H2ae                                                           | 0.0277456   | -2.16449 |
| 17345         | MKI67                           | antigen identified by monoclonal antibody Ki-67                                   | 0.000027    | -2.18479 |
| 107373        | FAM111A                         | family with sequence similarity 111, member A                                     | 0.000647876 | -2.196   |
| 13723         | EMB                             | embigin                                                                           | 0.000428365 | -2.20613 |
| 225887        | NDUFS8                          | NADH dehydrogenase (ubiquinone) Fe-S protein 8, 23kDa (NADH-coenzyme Q reductase) | 0.000173651 | -2.21006 |
| 233406        | PRC1<br>(includes<br>EG:233406) | protein regulator of cytokinesis 1                                                | 0.0011914   | -2.23144 |
| 14793         | CDCA3                           | cell division cycle associated 3                                                  | 0.00124908  | -2.23684 |
| 209737        | KIF15                           | kinesin family member 15                                                          | 0.000189367 | -2.24499 |
| 12428         | CCNA2                           | cyclin A2                                                                         | 0.000672474 | -2.25298 |
| 104369        | SNORA69                         | small nucleolar RNA, H/ACA box 69                                                 | 0.00711612  | -2.26463 |
| 12140         | FABP7                           | fatty acid binding protein 7, brain                                               | 0.00199771  | -2.29518 |
| 76464         | CASC5                           | cancer susceptibility candidate 5                                                 | 0.000327956 | -2.33329 |
| 20274         | SCN9A                           | sodium channel, voltage-gated, type IX, alpha subunit                             | 0.000086    | -2.34816 |
| 66977         | NUF2                            | NUF2, NDC80 kinetochore complex component, homolog (S, cerevisiae)                | 0.000336183 | -2.35582 |
| 19075         | PRIM1                           | primase, DNA, polypeptide 1 (49kDa)                                               | 0.00160035  | -2.36631 |
| 67141         | FBXO5                           | F-box protein 5                                                                   | 0.0000186   | -2.36786 |
| 16571         | KIF4A                           | kinesin family member 4A                                                          | 0.00000268  | -2.37402 |
| 20315         | Cxcl12                          | chemokine (C-X-C motif) ligand 12                                                 | 0.000487933 | -2.37507 |

|               |                                        |                                                            |             |          |
|---------------|----------------------------------------|------------------------------------------------------------|-------------|----------|
| 73804         | KIF2C                                  | kinesin family member 2C                                   | 0.000130751 | -2.43584 |
| 100043<br>123 | Cd300h<br>(includes<br>others)         | CD300 antigen like family member H                         | 0.0137798   | -2.55116 |
| 60411         | CENPK                                  | centromere protein K                                       | 0.0058706   | -2.69654 |
| 19243         | PTP4A1                                 | protein tyrosine phosphatase type IVA,<br>member 1         | 0.00238741  | -2.69731 |
| 12235         | BUB1<br>(includes<br>EG:100307076<br>) | budding uninhibited by benzimidazoles 1<br>homolog (yeast) | 0.00136081  | -2.79453 |
| 52033         | PBK                                    | PDZ binding kinase                                         | 0.0050121   | -2.90122 |
| 215029        | Prl3d1<br>(includes<br>others)         | prolactin family 3, subfamily d, member<br>1               | 0.0164364   | -3.04551 |

---

**Supplementary Table 2**

| Category           | Term                                                       | Count    | PValue   | Fold Enrichment | Bonferroni | Benjamini | FDR      |
|--------------------|------------------------------------------------------------|----------|----------|-----------------|------------|-----------|----------|
| Molecular Function | GO:0000166<br>nucleotide binding                           | 109      | 2.30E-07 | 1.60            | 1.26E-04   | 1.26E-05  | 3.36E-04 |
|                    | GO:0017076<br>purine nucleotide binding                    | 101      | 1.69E-08 | 1.73            | 9.22E-06   | 1.02E-06  | 2.46E-05 |
|                    | GO:0032553<br>ribonucleotide binding                       | 99       | 8.73E-09 | 1.77            | 4.77E-06   | 6.82E-07  | 1.27E-05 |
|                    | GO:0032555<br>purine ribonucleotide binding                | 99       | 8.73E-09 | 1.77            | 4.77E-06   | 6.82E-07  | 1.27E-05 |
|                    | GO:0001882<br>nucleoside binding                           | 91       | 2.63E-09 | 1.87            | 1.44E-06   | 7.20E-07  | 3.84E-06 |
|                    | GO:0001883<br>purine nucleoside binding                    | 90       | 4.25E-09 | 1.87            | 2.33E-06   | 7.75E-07  | 6.20E-06 |
|                    | GO:0030554<br>adenyl nucleotide binding                    | 88       | 1.30E-08 | 1.84            | 7.13E-06   | 8.92E-07  | 1.90E-05 |
|                    | GO:0003677<br>DNA binding                                  | 87       | 1.51E-05 | 1.57            | 8.25E-03   | 6.37E-04  | 2.21E-02 |
|                    | GO:0032559<br>adenyl ribonucleotide binding                | 86       | 5.76E-09 | 1.89            | 3.15E-06   | 7.88E-07  | 8.40E-06 |
|                    | GO:0005524<br>ATP binding                                  | 85       | 7.31E-09 | 1.89            | 4.00E-06   | 6.66E-07  | 1.07E-05 |
| Cellular Component | GO:0043228<br>non-membrane-bounded organelle               | 160      | 2.94E-33 | 2.59            | 1.03E-30   | 3.44E-31  | 4.02E-30 |
|                    | GO:0043232<br>intracellular non-membrane-bounded organelle | 160      | 2.94E-33 | 2.59            | 1.03E-30   | 3.44E-31  | 4.02E-30 |
|                    | GO:0005856<br>cytoskeleton                                 | 95       | 7.81E-19 | 2.63            | 2.74E-16   | 3.05E-17  | 1.07E-15 |
|                    | GO:0005694<br>chromosome                                   | 78       | 9.00E-41 | 6.40            | 3.16E-38   | 3.16E-38  | 1.23E-37 |
|                    | GO:0044430<br>cytoskeletal part                            | 70       | 5.06E-15 | 2.81            | 1.79E-12   | 1.28E-13  | 6.98E-12 |
|                    | GO:0044427<br>chromosomal part                             | 69       | 2.41E-37 | 6.73            | 8.46E-35   | 4.23E-35  | 3.30E-34 |
|                    | GO:0015630<br>microtubule cytoskeleton                     | 48       | 7.06E-13 | 3.31            | 2.48E-10   | 1.55E-11  | 9.66E-10 |
|                    | GO:0000775<br>chromosome. centromeric region               | 42       | 4.50E-33 | 11.74           | 1.58E-30   | 3.95E-31  | 6.15E-30 |
| GO:0000793         | 33                                                         | 9.69E-23 | 9.57     | 3.40E-20        | 6.81E-21   | 1.33E-19  |          |

|                    |                                          |     |          |      |          |          |          |
|--------------------|------------------------------------------|-----|----------|------|----------|----------|----------|
|                    | condensed chromosome                     |     |          |      |          |          |          |
|                    | GO:0043292 contractile fiber             | 28  | 9.93E-19 | 9.14 | 3.49E-16 | 3.49E-17 | 1.36E-15 |
| Biological Process | GO:0007049 cell cycle                    | 111 | 1.46E-50 | 5.35 | 3.20E-47 | 3.20E-47 | 2.53E-47 |
|                    | GO:0022402 cell cycle process            | 85  | 3.19E-44 | 6.38 | 6.99E-41 | 1.75E-41 | 5.54E-41 |
|                    | GO:0022403 cell cycle phase              | 81  | 1.10E-46 | 7.28 | 2.41E-43 | 8.02E-44 | 1.91E-43 |
|                    | GO:0000279 M phase                       | 77  | 1.30E-47 | 8.02 | 2.85E-44 | 1.42E-44 | 2.26E-44 |
|                    | GO:0051301 cell division                 | 73  | 1.53E-43 | 7.66 | 3.35E-40 | 5.58E-41 | 2.65E-40 |
|                    | GO:0000278 mitotic cell cycle            | 68  | 1.31E-42 | 8.21 | 2.87E-39 | 4.11E-40 | 2.28E-39 |
|                    | GO:0000087 M phase of mitotic cell cycle | 63  | 7.62E-44 | 9.57 | 1.67E-40 | 3.34E-41 | 1.32E-40 |
|                    | GO:0007067 mitosis                       | 61  | 4.33E-42 | 9.46 | 9.50E-39 | 1.19E-39 | 7.53E-39 |
|                    | GO:0000280 nuclear division              | 61  | 4.33E-42 | 9.46 | 9.50E-39 | 1.19E-39 | 7.53E-39 |
|                    | GO:0048285 organelle fission             | 61  | 4.67E-41 | 9.13 | 1.03E-37 | 1.14E-38 | 8.12E-38 |
